# Supplementary material
Source: PubMed Central journal article supplement (PMC6037162)
Supplement: ja8b04367_si_001.pdf [file ja8b04367_si_001.pdf]

## SUPPORTING INFORMATION

### **Enzyme Architecture: Amino Acid Side Chains Which Function to Optimize the Basicity of the Active Site Glutamate of Triosephosphate Isomerase.**

Xiang Zhai,<sup>‡</sup> Christopher J. Reinhardt,<sup>§</sup> M. Merced Malabanan,<sup>¶</sup> Tina L. Amyes,<sup>#</sup> and John P. Richard<sup>#,\*</sup>

<sup>‡</sup> Discovery Sciences, IMED Biotech Unit, AstraZeneca R&D Boston, 35 Gatehouse Dr., Waltham, Massachusetts 02451 United States <sup>§</sup> Department of Chemistry, University of Illinois at Urbana-Champaign, 600 S Mathews Ave., Urbana, Illinois 61801 United States, and <sup>¶</sup> Department of Biochemistry, Vanderbilt University, 842 Robinson Research Building, Nashville, Tennessee, 37205 United States and <sup>#</sup> Department of Chemistry, University at Buffalo, SUNY, Buffalo, New York 14260-3000 United States,

**pH-Profiles for Kinetic Parameters.** The Michaelis-Menten plots of  $v_i/[E]$  against  $[GAP]$  for isomerization of (*R*)-glyceraldehyde 3-phosphate (GAP) to dihydroxyacetone phosphate catalyzed by wildtype and mutant forms of TIM, in the absence of phosphoglycolate (PGA), or in the presence of different fixed concentrations of PGA are shown in Figures S1-S11. Values for the kinetic parameters  $k_{cat}$  and  $K_m$ , and the inhibition constants  $(K_i)_{obs}$  for inhibition by PGA, were determined from nonlinear least squares fit of data shown in Figures S1-S11 to equation S1 for competitive inhibition of TIM by PGA. Table S1 reports the values of  $k_{cat}$  and  $k_{cat}/K_m$  and Table 2 reports the values of  $(K_i)_{obs}$  determined from the fits for these data. The pH profiles of  $k_{cat}$  and  $k_{cat}/K_m$  are shown in Figures S12-S14. In cases where there is no sign of saturation at the highest substrate concentration of 12 mM substrate, the values of  $k_{cat}/K_m$  for the isomerization of GAP and the  $(K_i)_{obs}$  for competitive inhibition of TIM by PGA were determined from the nonlinear least squares fit of these kinetic data to eq S2.

$$\frac{v_i}{[E]} = \frac{k_{cat}[GAP]}{[GAP] + K_m \left(1 + \frac{[PGA]}{(K_i)_{obs}}\right)} \quad (S1)$$

$$\frac{v_i}{[E]} = \frac{k_{cat}[GAP]}{K_m \left(1 + \frac{[PGA]}{(K_i)_{obs}}\right)} \quad (S2)$$

Figure S15 shows the pH-dependence of the observed values  $K_i$  for inhibition of wildtype and mutant enzymes by PGA at 25 °C and  $I = 0.1$  (NaCl). The data in the region of the downward break may be fit to a Scheme where the inhibition is due exclusively to binding of the dianion form of the inhibitor to give a value  $pK_{HI} = 6.3$  for ionization of the inhibitor in water,<sup>1</sup> which is close to the value of 6.5 at  $I = 0.05$ .<sup>2</sup> However, it has been shown that PGA binds as the trianion  $I^{3-}$  to the *protonated* enzyme **EH** resulting in formation of the **EH•I<sup>3-</sup>** complex [see main

text]. The values of  $K_i$  for inhibition of wildtype and mutant TIMs by PGA trianion  $\mathbf{I}^{3-}$ , calculated from the values of  $(K_i)_{\text{obs}}$  using eq S3  $pK_a = 6.4$  for ionization of  $\mathbf{HI}^{2-}$  to give  $\mathbf{I}^{3-}$ , are reported in Tables 2 and 3. Tables S2 and S3 also report the ratios  $[K_i^{\text{M}}]/[K_i^{\text{WT}}]$ , which show the effects of these mutations on the value of  $K_i$  at the give pH.

$$K_i = \left( \frac{K_a}{K_a + [\text{H}^+]} \right) (K_i)_{\text{obs}} \quad (\text{S3})$$

**Table S1.** Kinetic Parameters for Isomerization of GAP Catalyzed by Wildtype and Mutant TIMs at 25 °C and  $I = 0.1$  (NaCl)

Determined Fits from Figures S1-S11 to the Michaelis-Menten Equation.

| pH  | WT <i>c</i> TIM                        |                        |                                                                     | <i>c</i> L7R <i>c</i> TIM [loop 7 replacement] <sup>3</sup> |                        |                                                                     |
|-----|----------------------------------------|------------------------|---------------------------------------------------------------------|-------------------------------------------------------------|------------------------|---------------------------------------------------------------------|
|     | $k_{\text{cat}}$<br>(s <sup>-1</sup> ) | $K_{\text{m}}$<br>(mM) | $k_{\text{cat}}/K_{\text{m}}$<br>(M <sup>-1</sup> s <sup>-1</sup> ) | $k_{\text{cat}}$<br>(s <sup>-1</sup> )                      | $K_{\text{m}}$<br>(mM) | $k_{\text{cat}}/K_{\text{m}}$<br>(M <sup>-1</sup> s <sup>-1</sup> ) |
| 4.9 | $(1.1 \pm 0.1) \times 10^3$            | $1.1 \pm 0.1$          | $(1.0 \pm 0.1) \times 10^6$                                         | $18 \pm 0.7$                                                | $5.5 \pm 0.4$          | $(3.3 \pm 0.3) \times 10^3$                                         |
| 5.7 | $(2.1 \pm 0.1) \times 10^3$            | $0.53 \pm 0.02$        | $(4.0 \pm 0.2) \times 10^6$                                         | $21 \pm 0.1$                                                | $1.5 \pm 0.1$          | $(1.4 \pm 0.1) \times 10^4$                                         |
| 6.4 | $(3.2 \pm 0.1) \times 10^3$            | $0.29 \pm 0.02$        | $(1.1 \pm 0.3) \times 10^7$                                         | $19 \pm 0.2$                                                | $0.52 \pm 0.02$        | $(3.7 \pm 0.1) \times 10^4$                                         |
| 7.0 | $(3.0 \pm 0.1) \times 10^3$            | $0.24 \pm 0.01$        | $(1.3 \pm 0.4) \times 10^7$                                         | $17 \pm 0.2$                                                | $0.30 \pm 0.01$        | $(5.7 \pm 0.2) \times 10^4$                                         |
| 7.5 | $(3.4 \pm 0.1) \times 10^3$            | $0.29 \pm 0.02$        | $(1.2 \pm 0.1) \times 10^7$                                         | $15 \pm 0.2$                                                | $0.29 \pm 0.01$        | $(5.2 \pm 0.2) \times 10^4$                                         |
| 8.3 | $(3.6 \pm 0.1) \times 10^3$            | $0.28 \pm 0.01$        | $(1.3 \pm 0.1) \times 10^7$                                         | $11 \pm 0.1$                                                | $0.22 \pm 0.01$        | $(5.0 \pm 0.3) \times 10^4$                                         |
| 8.9 |                                        |                        |                                                                     | $8.0 \pm 0.1$                                               | $0.21 \pm 0.01$        | $(3.6 \pm 0.2) \times 10^4$                                         |
| 9.3 | $(3.8 \pm 0.1) \times 10^3$            | $0.32 \pm 0.01$        | $(1.2 \pm 0.1) \times 10^7$                                         | $8.0 \pm 0.1$                                               | $0.23 \pm 0.01$        | $(3.5 \pm 0.2) \times 10^4$                                         |
| 9.9 | $(3.3 \pm 0.1) \times 10^3$            | $0.44 \pm 0.01$        | $(7.5 \pm 0.3) \times 10^6$                                         |                                                             |                        |                                                                     |

| pH  | WT <i>Tbb</i> TIM <sup>a</sup>         |                        |                                                                     | P166A <i>Tbb</i> TIM                   |                        |                                                                     |
|-----|----------------------------------------|------------------------|---------------------------------------------------------------------|----------------------------------------|------------------------|---------------------------------------------------------------------|
|     | $k_{\text{cat}}$<br>(s <sup>-1</sup> ) | $K_{\text{m}}$<br>(mM) | $k_{\text{cat}}/K_{\text{m}}$<br>(M <sup>-1</sup> s <sup>-1</sup> ) | $k_{\text{cat}}$<br>(s <sup>-1</sup> ) | $K_{\text{m}}$<br>(mM) | $k_{\text{cat}}/K_{\text{m}}$<br>(M <sup>-1</sup> s <sup>-1</sup> ) |
| 4.9 | $1.5 \times 10^3$                      | 3.8                    | $4.0 \times 10^5$                                                   | $25 \pm 0.3$                           | $2.3 \pm 0.1$          | $(1.1 \pm 0.1) \times 10^4$                                         |
| 5.7 | $1.9 \times 10^3$                      | 0.98                   | $2.0 \times 10^6$                                                   | $25 \pm 0.8$                           | $0.40 \pm 0.05$        | $(6.2 \pm 0.1) \times 10^4$                                         |
| 6.4 | $2.0 \times 10^3$                      | 0.49                   | $4.1 \times 10^6$                                                   | $27 \pm 0.3$                           | $0.13 \pm 0.01$        | $(2.0 \pm 0.2) \times 10^5$                                         |
| 7.5 | $2.1 \times 10^3$                      | 0.33                   | $6.2 \times 10^6$                                                   | $27 \pm 0.4$                           | $0.11 \pm 0.01$        | $(2.5 \pm 0.2) \times 10^5$                                         |
| 8.3 | $2.0 \times 10^3$                      | 0.25                   | $8.0 \times 10^6$                                                   | $27 \pm 0.4$                           | $0.11 \pm 0.01$        | $(2.4 \pm 0.2) \times 10^5$                                         |
| 8.9 | $1.9 \times 10^3$                      | 0.32                   | $6.0 \times 10^6$                                                   | $27 \pm 0.4$                           | $0.10 \pm 0.01$        | $(2.6 \pm 0.3) \times 10^5$                                         |
| 9.3 | $2.0 \times 10^3$                      | 0.34                   | $5.8 \times 10^6$                                                   | $29 \pm 0.3$                           | $0.091 \pm 0.005$      | $(3.2 \pm 0.2) \times 10^5$                                         |
| 9.9 | $1.3 \times 10^3$                      | 0.33                   | $3.9 \times 10^6$                                                   | $20 \pm 0.4$                           | $0.13 \pm 0.01$        | $(1.6 \pm 0.1) \times 10^5$                                         |

<sup>a</sup> Data from reference 6, except kinetic parameters at pH 9.9.

| pH  | WT yTIM                                 |                        |                                                                    | Y208T yTIM                              |                        |                                                                    |
|-----|-----------------------------------------|------------------------|--------------------------------------------------------------------|-----------------------------------------|------------------------|--------------------------------------------------------------------|
|     | $k_{\text{cat}}$<br>( $\text{s}^{-1}$ ) | $K_{\text{m}}$<br>(mM) | $k_{\text{cat}}/K_{\text{m}}$<br>( $\text{M}^{-1} \text{s}^{-1}$ ) | $k_{\text{cat}}$<br>( $\text{s}^{-1}$ ) | $K_{\text{m}}$<br>(mM) | $k_{\text{cat}}/K_{\text{m}}$<br>( $\text{M}^{-1} \text{s}^{-1}$ ) |
| 4.9 | $(5.0 \pm 0.2) \times 10^3$             | $6.5 \pm 0.7$          | $(7.7 \pm 0.9) \times 10^5$                                        | Linear Plots                            |                        | $(9.5 \pm 0.1) \times 10^4$                                        |
| 5.7 | $(5.9 \pm 0.1) \times 10^3$             | $1.2 \pm 0.1$          | $(4.9 \pm 0.4) \times 10^6$                                        | $\approx 7.2 \times 10^3$               | $\approx 26$           | $(2.8 \pm 0.5) \times 10^5$                                        |
| 6.4 | $(7.6 \pm 0.1) \times 10^3$             | $1.0 \pm 0.1$          | $(7.6 \pm 0.8) \times 10^6$                                        | $(4.1 \pm 0.3) \times 10^3$             | $3.8 \pm 0.7$          | $(1.1 \pm 0.2) \times 10^6$                                        |
| 7.5 | $(8.9 \pm 0.2) \times 10^3$             | $1.1 \pm 0.1$          | $(8.9 \pm 0.8) \times 10^6$                                        | $(3.7 \pm 0.3) \times 10^3$             | $3.7 \pm 0.7$          | $(1.0 \pm 0.2) \times 10^6$                                        |
| 8.3 | $(7.8 \pm 0.1) \times 10^3$             | $0.85 \pm 0.03$        | $(9.2 \pm 0.3) \times 10^6$                                        | $(3.4 \pm 0.1) \times 10^3$             | $3.5 \pm 0.3$          | $(9.8 \pm 0.9) \times 10^5$                                        |
| 8.9 | $(8.9 \pm 0.1) \times 10^3$             | $1.1 \pm 0.1$          | $(8.3 \pm 0.7) \times 10^6$                                        | $(3.4 \pm 0.1) \times 10^3$             | $3.4 \pm 0.3$          | $(9.9 \pm 0.9) \times 10^5$                                        |
| 9.3 | $(6.4 \pm 0.1) \times 10^3$             | $0.57 \pm 0.04$        | $(1.1 \pm 0.1) \times 10^7$                                        | $(2.4 \pm 0.1) \times 10^3$             | $2.8 \pm 0.4$          | $(8.4 \pm 1.3) \times 10^5$                                        |
| 9.9 | $(7.8 \pm 0.2) \times 10^3$             | $1.3 \pm 0.1$          | $(5.9 \pm 0.5) \times 10^6$                                        |                                         |                        |                                                                    |

| pH  | Y208S yTIM                              |                        |                                                                    | Y208A yTIM                              |                        |                                                                    |
|-----|-----------------------------------------|------------------------|--------------------------------------------------------------------|-----------------------------------------|------------------------|--------------------------------------------------------------------|
|     | $k_{\text{cat}}$<br>( $\text{s}^{-1}$ ) | $K_{\text{m}}$<br>(mM) | $k_{\text{cat}}/K_{\text{m}}$<br>( $\text{M}^{-1} \text{s}^{-1}$ ) | $k_{\text{cat}}$<br>( $\text{s}^{-1}$ ) | $K_{\text{m}}$<br>(mM) | $k_{\text{cat}}/K_{\text{m}}$<br>( $\text{M}^{-1} \text{s}^{-1}$ ) |
| 4.9 | $\approx 240$                           | $\approx 21$           | $(1.2 \pm 0.3) \times 10^4$                                        | Linear Plots                            |                        | $(1.3 \pm 0.1) \times 10^4$                                        |
| 5.7 | $\approx 1.3 \times 10^3$               | $\approx 29$           | $(4.5 \pm 1.5) \times 10^4$                                        | $\approx 750$                           | $\approx 16$           | $(4.5 \pm 0.5) \times 10^4$                                        |
| 6.4 | $870 \pm 30$                            | $5.4 \pm 0.6$          | $(1.6 \pm 0.2) \times 10^5$                                        | $440 \pm 6$                             | $3.1 \pm 0.1$          | $(1.4 \pm 0.1) \times 10^5$                                        |
| 7.5 | $910 \pm 20$                            | $4.1 \pm 0.2$          | $(2.2 \pm 0.1) \times 10^5$                                        | $460 \pm 8$                             | $2.6 \pm 0.1$          | $(1.8 \pm 0.1) \times 10^5$                                        |
| 8.3 | $786 \pm 30$                            | $3.8 \pm 0.3$          | $(2.1 \pm 0.2) \times 10^5$                                        | $510 \pm 10$                            | $2.4 \pm 0.1$          | $(2.1 \pm 0.1) \times 10^5$                                        |
| 8.9 | $699 \pm 30$                            | $4.0 \pm 0.3$          | $(1.7 \pm 0.1) \times 10^5$                                        | $520 \pm 8$                             | $2.8 \pm 0.1$          | $(1.8 \pm 0.1) \times 10^5$                                        |
| 9.3 | $645 \pm 30$                            | $3.7 \pm 0.3$          | $(1.7 \pm 0.2) \times 10^5$                                        | $410 \pm 6$                             | $2.0 \pm 0.1$          | $(2.0 \pm 0.1) \times 10^5$                                        |
| 9.9 |                                         |                        |                                                                    | $430 \pm 12$                            | $3.4 \pm 0.2$          | $(1.3 \pm 0.1) \times 10^5$                                        |

| pH  | Y208F yTIM                              |                        |                                                                    | S211A yTIM                              |                        |                                                                    |
|-----|-----------------------------------------|------------------------|--------------------------------------------------------------------|-----------------------------------------|------------------------|--------------------------------------------------------------------|
|     | $k_{\text{cat}}$<br>( $\text{s}^{-1}$ ) | $K_{\text{m}}$<br>(mM) | $k_{\text{cat}}/K_{\text{m}}$<br>( $\text{M}^{-1} \text{s}^{-1}$ ) | $k_{\text{cat}}$<br>( $\text{s}^{-1}$ ) | $K_{\text{m}}$<br>(mM) | $k_{\text{cat}}/K_{\text{m}}$<br>( $\text{M}^{-1} \text{s}^{-1}$ ) |
| 4.9 | $\approx 11$                            | $\approx 35$           | $(3.2 \pm 0.1) \times 10^2$                                        |                                         |                        | $(9.2 \pm 0.1) \times 10^3$                                        |
| 5.7 | $\approx 21$                            | $\approx 18$           | $(1.2 \pm 0.3) \times 10^3$                                        | Linear plots                            |                        | $(5.0 \pm 0.6) \times 10^4$                                        |
| 6.4 | $17 \pm 1$                              | $5.2 \pm 0.6$          | $(3.2 \pm 0.4) \times 10^3$                                        |                                         |                        | $(1.2 \pm 0.1) \times 10^5$                                        |
| 7.5 | $19 \pm 0.7$                            | $2.0 \pm 0.2$          | $(9.6 \pm 1.0) \times 10^3$                                        | $2900 \pm 70$                           | $13 \pm 1$             | $(2.2 \pm 0.2) \times 10^5$                                        |
| 8.3 | $17 \pm 0.3$                            | $2.4 \pm 0.1$          | $(7.1 \pm 0.3) \times 10^3$                                        | $2900 \pm 400$                          | $13 \pm 3$             | $(2.3 \pm 0.6) \times 10^5$                                        |
| 8.9 | $16 \pm 0.3$                            | $2.6 \pm 0.1$          | $(6.0 \pm 0.3) \times 10^3$                                        | $3500 \pm 1100$                         | $23 \pm 9$             | $(1.5 \pm 0.7) \times 10^5$                                        |
| 9.3 | $13 \pm 0.3$                            | $1.9 \pm 0.1$          | $(6.2 \pm 0.4) \times 10^3$                                        |                                         |                        |                                                                    |



| pH  | S211G yTIM                              |                        |                                                                    | Y208T/S211G yTIM                        |                        |                                                                    |
|-----|-----------------------------------------|------------------------|--------------------------------------------------------------------|-----------------------------------------|------------------------|--------------------------------------------------------------------|
|     | $k_{\text{cat}}$<br>( $\text{s}^{-1}$ ) | $K_{\text{m}}$<br>(mM) | $k_{\text{cat}}/K_{\text{m}}$<br>( $\text{M}^{-1} \text{s}^{-1}$ ) | $k_{\text{cat}}$<br>( $\text{s}^{-1}$ ) | $K_{\text{m}}$<br>(mM) | $k_{\text{cat}}/K_{\text{m}}$<br>( $\text{M}^{-1} \text{s}^{-1}$ ) |
| 4.9 | $4100 \pm 400$                          | $13 \pm 2$             | $(3.2 \pm 0.6) \times 10^5$                                        | $380 \pm 26$                            | $10 \pm 0.9$           | $(3.8 \pm 0.4) \times 10^4$                                        |
| 5.7 | $6400 \pm 460$                          | $4.3 \pm 0.6$          | $(1.5 \pm 0.2) \times 10^6$                                        | $490 \pm 10$                            | $2.4 \pm 0.1$          | $(2.0 \pm 0.1) \times 10^5$                                        |
| 6.4 | $7200 \pm 120$                          | $2.1 \pm 0.1$          | $(3.5 \pm 0.2) \times 10^6$                                        | $490 \pm 8$                             | $0.83 \pm 0.05$        | $(5.9 \pm 0.4) \times 10^5$                                        |
| 7.5 | $7500 \pm 230$                          | $2.1 \pm 0.2$          | $(4.2 \pm 0.4) \times 10^6$                                        | $520 \pm 5$                             | $0.71 \pm 0.02$        | $(7.3 \pm 0.2) \times 10^5$                                        |
| 8.3 | $7000 \pm 100$                          | $1.3 \pm 0.1$          | $(5.2 \pm 0.4) \times 10^6$                                        | $540 \pm 5$                             | $0.52 \pm 0.02$        | $(1.0 \pm 0.1) \times 10^6$                                        |
| 8.9 |                                         |                        |                                                                    | $530 \pm 5$                             | $0.78 \pm 0.02$        | $(6.9 \pm 0.2) \times 10^6$                                        |
| 9.3 | $7000 \pm 180$                          | $1.4 \pm 0.1$          | $(5.0 \pm 0.4) \times 10^6$                                        | $540 \pm 13$                            | $0.86 \pm 0.06$        | $(6.3 \pm 0.5) \times 10^4$                                        |
| 9.9 | $6040 \pm 220$                          | $2.0 \pm 0.2$          | $(3.0 \pm 0.3) \times 10^6$                                        |                                         |                        |                                                                    |

**Table S2.** Observed Inhibition Constants ( $K_i$ )<sub>obs</sub> for Inhibition of Wildtype and Mutant TIM-catalyzed Isomerization of GAP by PGA and Inhibition Constants  $K_i$  (M) Calculated for Binding of the Active Trianion Form of PGA.<sup>a</sup>

| pH  | Inhibition Constant          | Wildtype <i>c</i> TIM <sup>b</sup> | L7R <i>c</i> TIM <sup>c</sup>  | Wildtype <i>Tbb</i> TIM <sup>d</sup> | P166A <i>Tbb</i> TIM <sup>e</sup> |
|-----|------------------------------|------------------------------------|--------------------------------|--------------------------------------|-----------------------------------|
| 4.9 | ( $K_i$ ) <sub>obs</sub> (M) | $(6.2 \pm 0.6) \times 10^{-7}$     | $(7.2 \pm 0.9) \times 10^{-4}$ | $3.1 \times 10^{-6}$                 | $(1.6 \pm 0.1) \times 10^{-5}$    |
|     | $K_i$ (M)                    | $2.3 \times 10^{-8}$               | $3.2 \times 10^{-5}$           | $1.1 \times 10^{-7}$                 | $5.3 \times 10^{-7}$              |
|     | $[K_i^M]/[K_i^{WT}]$         |                                    | 1390                           |                                      | 4.8                               |
| 5.7 | ( $K_i$ ) <sub>obs</sub> (M) | $(9.9 \pm 0.6) \times 10^{-7}$     | $(1.6 \pm 0.1) \times 10^{-3}$ | $3.6 \times 10^{-6}$                 | $(1.6 \pm 0.3) \times 10^{-5}$    |
|     | $K_i$ (M)                    | $1.8 \times 10^{-7}$               | $2.9 \times 10^{-4}$           | $6.6 \times 10^{-7}$                 | $2.9 \times 10^{-6}$              |
|     | $[K_i^M]/[K_i^{WT}]$         |                                    | 1610                           |                                      | 4.4                               |
| 6.4 | ( $K_i$ ) <sub>obs</sub> (M) | $(1.9 \pm 0.1) \times 10^{-6}$     | $(1.6 \pm 0.1) \times 10^{-3}$ | $8.6 \times 10^{-6}$                 | $(2.0 \pm 0.1) \times 10^{-5}$    |
|     | $K_i$ (M)                    | $1.0 \times 10^{-6}$               | $8.3 \times 10^{-4}$           | $4.6 \times 10^{-6}$                 | $1.1 \times 10^{-5}$              |
|     | $[K_i^M]/[K_i^{WT}]$         |                                    | 830                            |                                      | 2.4                               |
| 7.0 | ( $K_i$ ) <sub>obs</sub> (M) | $(4.7 \pm 0.3) \times 10^{-6}$     | $(1.7 \pm 0.1) \times 10^{-3}$ |                                      |                                   |
|     | $K_i$ (M)                    | $3.8 \times 10^{-6}$               | $1.4 \times 10^{-3}$           |                                      |                                   |
|     | $[K_i^M]/[K_i^{WT}]$         |                                    | 370                            |                                      |                                   |

| pH  | Inhibition Constant                  | Wildtype <i>c</i> TIM <sup>b</sup> | L7R <i>c</i> TIM <sup>c</sup>  | Wildtype <i>Tbb</i> TIM <sup>d</sup> | P166A <i>Tbb</i> TIM <sup>e</sup> |
|-----|--------------------------------------|------------------------------------|--------------------------------|--------------------------------------|-----------------------------------|
| 7.5 | $(K_i)_{\text{obs}}$ (M)             | $(1.9 \pm 0.1) \times 10^{-5}$     | $(2.3 \pm 0.1) \times 10^{-3}$ | $5.5 \times 10^{-5}$                 | $(1.4 \pm 0.1) \times 10^{-4}$    |
|     | $K_i$ (M)                            | $1.8 \times 10^{-5}$               | $2.2 \times 10^{-3}$           | $5.1 \times 10^{-5}$                 | $1.3 \times 10^{-4}$              |
|     | $[K_i^{\text{M}}]/[K_i^{\text{WT}}]$ |                                    | 122                            |                                      | 2.5                               |
| 8.3 | $(K_i)_{\text{obs}}$ (M)             | $(1.0 \pm 0.1) \times 10^{-4}$     | $(2.4 \pm 0.2) \times 10^{-3}$ | $2.3 \times 10^{-4}$                 | $(7.7 \pm 0.4) \times 10^{-4}$    |
|     | $K_i$ (M)                            | $9.9 \times 10^{-5}$               | $2.4 \times 10^{-3}$           | $2.3 \times 10^{-4}$                 | $7.6 \times 10^{-4}$              |
|     | $[K_i^{\text{M}}]/[K_i^{\text{WT}}]$ |                                    | 24                             |                                      | 3.5                               |
| 8.9 | $(K_i)_{\text{obs}}$ (M)             |                                    | $(1.8 \pm 0.1) \times 10^{-3}$ | $1.0 \times 10^{-3}$                 | $(2.2 \pm 0.1) \times 10^{-4}$    |
|     | $K_i$ (M)                            |                                    | $1.8 \times 10^{-3}$           | $1.0 \times 10^{-3}$                 | $2.2 \times 10^{-4}$              |
|     | $[K_i^{\text{M}}]/[K_i^{\text{WT}}]$ |                                    |                                |                                      | 2.2                               |
| 9.3 | $(K_i)_{\text{obs}}$ (M)             | $(1.0 \pm 0.1) \times 10^{-3}$     | $(4.2 \pm 0.3) \times 10^{-3}$ | $2.2 \times 10^{-3}$                 | $(3.7 \pm 0.3) \times 10^{-3}$    |
|     | $K_i$ (M)                            | $1.0 \times 10^{-3}$               | $4.2 \times 10^{-3}$           | $2.2 \times 10^{-3}$                 | $3.7 \times 10^{-3}$              |
|     | $[K_i^{\text{M}}]/[K_i^{\text{WT}}]$ |                                    | 4.2                            |                                      | 1.7                               |
| 9.9 | $(K_i)_{\text{obs}}$ (M)             | $(6.5 \pm 0.5) \times 10^{-3}$     |                                | $7.7 \times 10^{-3}$                 | $(9.6 \pm 1.0) \times 10^{-3}$    |
|     | $K_i$ (M)                            | $6.5 \times 10^{-3}$               |                                | $7.7 \times 10^{-3}$                 | $9.6 \times 10^{-3}$              |
|     | $[K_i^{\text{M}}]/[K_i^{\text{WT}}]$ |                                    |                                |                                      | 1.2                               |

<sup>a</sup> For reactions at 25 °C and I = 0.1 (NaCl). <sup>b</sup> Data from Figure S9. <sup>c</sup> Loop seven replacement mutant. Data from Figure S10. <sup>d</sup> Data from reference, except for the kinetic parameters determined at pH 9.9. <sup>e</sup> Data from Figure S11.

**Table S3.** Observed Inhibition Constants ( $K_i$ )<sub>obs</sub> for Inhibition of Wildtype and Mutant-TIM-catalyzed Isomerization of GAP by Phosphoglycolate and Inhibition Constants  $K_i$  (M) Calculated for Binding of the Active Trianion Form of Phosphoglycolate.<sup>a</sup>

| pH  | Inhibition Constant          | WT yTIM <sup>b</sup>           | Y208T yTIM <sup>c</sup>        | Y208S yTIM <sup>d</sup>        | Y208A yTIM <sup>e</sup>        | Y208F yTIM <sup>f</sup>        | S211A yTIM <sup>g</sup>        | S211G yTIM <sup>h</sup>        | Y208T/S211G yTIM <sup>i</sup>  |
|-----|------------------------------|--------------------------------|--------------------------------|--------------------------------|--------------------------------|--------------------------------|--------------------------------|--------------------------------|--------------------------------|
|     | ( $K_i$ ) <sub>obs</sub> (M) | (2.0 ± 0.2) × 10 <sup>-6</sup> | (2.3 ± 0.1) × 10 <sup>-5</sup> | (1.6 ± 0.1) × 10 <sup>-4</sup> | (1.4 ± 0.1) × 10 <sup>-4</sup> | (1.9 ± 0.2) × 10 <sup>-2</sup> | (3.2 ± 0.1) × 10 <sup>-4</sup> | (6.4 ± 0.3) × 10 <sup>-6</sup> | (5.4 ± 0.2) × 10 <sup>-5</sup> |
| 4.9 | $K_i$ (M)                    | 6.9 × 10 <sup>-8</sup>         | 7.9 × 10 <sup>-7</sup>         | 5.4 × 10 <sup>-6</sup>         | 4.6 × 10 <sup>-6</sup>         | 6.5 × 10 <sup>-4</sup>         | 1.1 × 10 <sup>-5</sup>         | 2.2 × 10 <sup>-7</sup>         | 1.8 × 10 <sup>-6</sup>         |
|     | $[K_i^M]/[K_i^{WT}]$         |                                | 11                             | 78                             | 67                             | 9420                           | 159                            | 3.2                            | 26                             |
|     | ( $K_i$ ) <sub>obs</sub> (M) | (2.4 ± 0.1) × 10 <sup>-6</sup> | (4.3 ± 0.2) × 10 <sup>-5</sup> | (2.0 ± 0.2) × 10 <sup>-4</sup> | (1.5 ± 0.1) × 10 <sup>-4</sup> | (1.8 ± 0.1) × 10 <sup>-2</sup> | (5.1 ± 0.2) × 10 <sup>-4</sup> | (7.4 ± 0.4) × 10 <sup>-6</sup> | (5.4 ± 0.2) × 10 <sup>-5</sup> |
| 5.7 | $K_i$ (M)                    | 4.4 × 10 <sup>-7</sup>         | 7.9 × 10 <sup>-6</sup>         | 3.7 × 10 <sup>-5</sup>         | 2.8 × 10 <sup>-5</sup>         | 3.4 × 10 <sup>-3</sup>         | 9.3 × 10 <sup>-5</sup>         | 1.4 × 10 <sup>-6</sup>         | 9.9 × 10 <sup>-6</sup>         |
|     | $[K_i^M]/[K_i^{WT}]$         |                                | 18                             | 84                             | 64                             | 7730                           | 211                            | 3.2                            | 23                             |
|     | ( $K_i$ ) <sub>obs</sub> (M) | (5.1 ± 0.3) × 10 <sup>-6</sup> | (4.2 ± 0.7) × 10 <sup>-5</sup> | (3.2 ± 0.4) × 10 <sup>-4</sup> | (3.7 ± 0.1) × 10 <sup>-4</sup> | (1.6 ± 0.2) × 10 <sup>-2</sup> | (6.5 ± 0.6) × 10 <sup>-4</sup> | (1.4 ± 0.1) × 10 <sup>-5</sup> | (7.8 ± 0.6) × 10 <sup>-5</sup> |
| 6.4 | $K_i$ (M)                    | 2.7 × 10 <sup>-6</sup>         | 2.2 × 10 <sup>-5</sup>         | 1.7 × 10 <sup>-4</sup>         | 2.0 × 10 <sup>-4</sup>         | 8.3 × 10 <sup>-2</sup>         | 3.4 × 10 <sup>-4</sup>         | 7.6 × 10 <sup>-6</sup>         | 4.1 × 10 <sup>-5</sup>         |
|     | $[K_i^M]/[K_i^{WT}]$         |                                | 8.1                            | 63                             | 7                              | 3070                           | 126                            | 2.8                            | 15                             |
|     | ( $K_i$ ) <sub>obs</sub> (M) | (3.8 ± 0.4) × 10 <sup>-5</sup> | (3.2 ± 0.1) × 10 <sup>-4</sup> | (2.0 ± 0.1) × 10 <sup>-3</sup> | (2.6 ± 0.1) × 10 <sup>-3</sup> | (1.7 ± 0.2) × 10 <sup>-2</sup> | (4.4 ± 0.3) × 10 <sup>-3</sup> | (6.4 ± 0.6) × 10 <sup>-5</sup> | (6.8 ± 0.4) × 10 <sup>-4</sup> |
| 7.5 | $K_i$ (M)                    | 3.6 × 10 <sup>-5</sup>         | 3.0 × 10 <sup>-4</sup>         | 1.8 × 10 <sup>-3</sup>         | 2.4 × 10 <sup>-3</sup>         | 1.6 × 10 <sup>-2</sup>         | 4.1 × 10 <sup>-3</sup>         | 6.0 × 10 <sup>-5</sup>         | 6.5 × 10 <sup>-4</sup>         |
|     | $[K_i^M]/[K_i^{WT}]$         |                                | 8.3                            | 50                             | 67                             | 440                            | 114                            | 1.7                            | 13                             |



<sup>a</sup> For reactions at 25 °C and I = 0.1 (NaCl). <sup>b</sup> Data from Figure S1 <sup>c</sup> Data from Figure S2. <sup>d</sup> Data from Figure S3. <sup>e</sup> Data from Figure S4. <sup>f</sup> Data from Figure S5. <sup>g</sup> Data from Figure S6. <sup>h</sup> Data from Figure S7. <sup>i</sup> Data from Figure S8.

**FIGURE LEGENDS**

**Figure S1.** Michaelis-Menten plots for uninhibited and the PGA-inhibited isomerization of GAP catalyzed by wildtype yTIM at pH 4.9 - 9.9, 25 °C and  $I = 0.1$  (NaCl).

**Figure S2.** Michaelis-Menten plots for uninhibited and the PGA-inhibited isomerization of GAP catalyzed by Y208T yTIM at pH 4.9 - 9.3, 25 °C and  $I = 0.1$  (NaCl).

**Figure S3.** Michaelis-Menten plots for uninhibited and the PGA-inhibited isomerization of GAP catalyzed by Y208S yTIM at pH 4.9 - 8.9, 25 °C and  $I = 0.1$  (NaCl).

**Figure S4.** Michaelis-Menten plots for uninhibited and the PGA-inhibited isomerization of GAP catalyzed by Y208A yTIM at pH 4.9 - 8.9, 25 °C and  $I = 0.1$  (NaCl).

**Figure S5.** Michaelis-Menten plots for uninhibited and the PGA-inhibited isomerization of GAP catalyzed by Y208F yTIM at pH 4.9 - 9.3, 25 °C and  $I = 0.1$  (NaCl).

**Figure S6.** Michaelis-Menten plots for uninhibited and the PGA-inhibited isomerization of GAP catalyzed by S211A yTIM at pH 4.9 - 8.9, 25 °C and  $I = 0.1$  (NaCl).

**Figure S7.** Michaelis-Menten plots for uninhibited and the PGA-inhibited isomerization of GAP catalyzed by S211G yTIM at pH 4.9 - 9.9, 25 °C and  $I = 0.1$  (NaCl).



**Figure S8.** Michaelis-Menten plots for uninhibited and the PGA-inhibited isomerization of GAP catalyzed by Y208T/S211G yTIM at pH 4.9 - 9.3, 25 °C and  $I = 0.1$  (NaCl).

**Figure S9.** Michaelis-Menten plots for uninhibited and the PGA-inhibited isomerization of GAP catalyzed by wildtype cTIM at pH 4.9 - 9.9, 25 °C and  $I = 0.1$  (NaCl).

**Figure S10.** Michaelis-Menten plots for uninhibited and the PGA-inhibited isomerization of GAP catalyzed by a loop 7 replacement mutant of cTIM (L7R cTIM) at pH 5.7 - 9.3, 25 °C and  $I = 0.1$  (NaCl).

**Figure S11.** Michaelis-Menten plots for uninhibited and the PGA-inhibited isomerization of GAP catalyzed by P166A TbbTIM at pH 4.9 - 9.9, 25 °C and  $I = 0.1$  (NaCl).

**Figure S12.** pH-Rate profiles of values for  $k_{\text{cat}}$  and  $k_{\text{cat}}/K_{\text{m}}$  determined for isomerization reactions of GAP catalyzed by wildtype TbbTIM, wildtype cTIM, TbbP166A TIM, TbbI170A TIM and cL7R TIM. Data for TbbI170A TIM are from Ref 1.

**Figure S13.** pH-Rate profiles of values for  $k_{\text{cat}}$  and  $k_{\text{cat}}/K_{\text{m}}$  determined for isomerization reactions of GAP catalyzed by wildtype yTIM, Y208T yTIM, Y208S yTIM, Y208A yTIM, and Y208F yTIM.

**Figure S14.** pH-Rate profiles of values for  $k_{\text{cat}}$  and  $k_{\text{cat}}/K_{\text{m}}$  determined for isomerization reactions of GAP catalyzed S211G yTIM, S211A yTIM, and Y208T/S211G yTIM.

**Figure S15.** pH-Rate profiles of values for  $(K_1)_{\text{obs}}$  determined for wildtype TIM from yeast, chicken and *Typanosoma brucei brucei*, and the L7R cTIM, P166A *Tbb*TIM, I170A *Tbb*TIM, Y208S/T/A/F yTIM, S211G/A yTIM, and Y208T/S211G yTIM. Data for I170A *Tbb*TIM are from ref. 1.

FIGURE S1 [Wilttype yTIM]

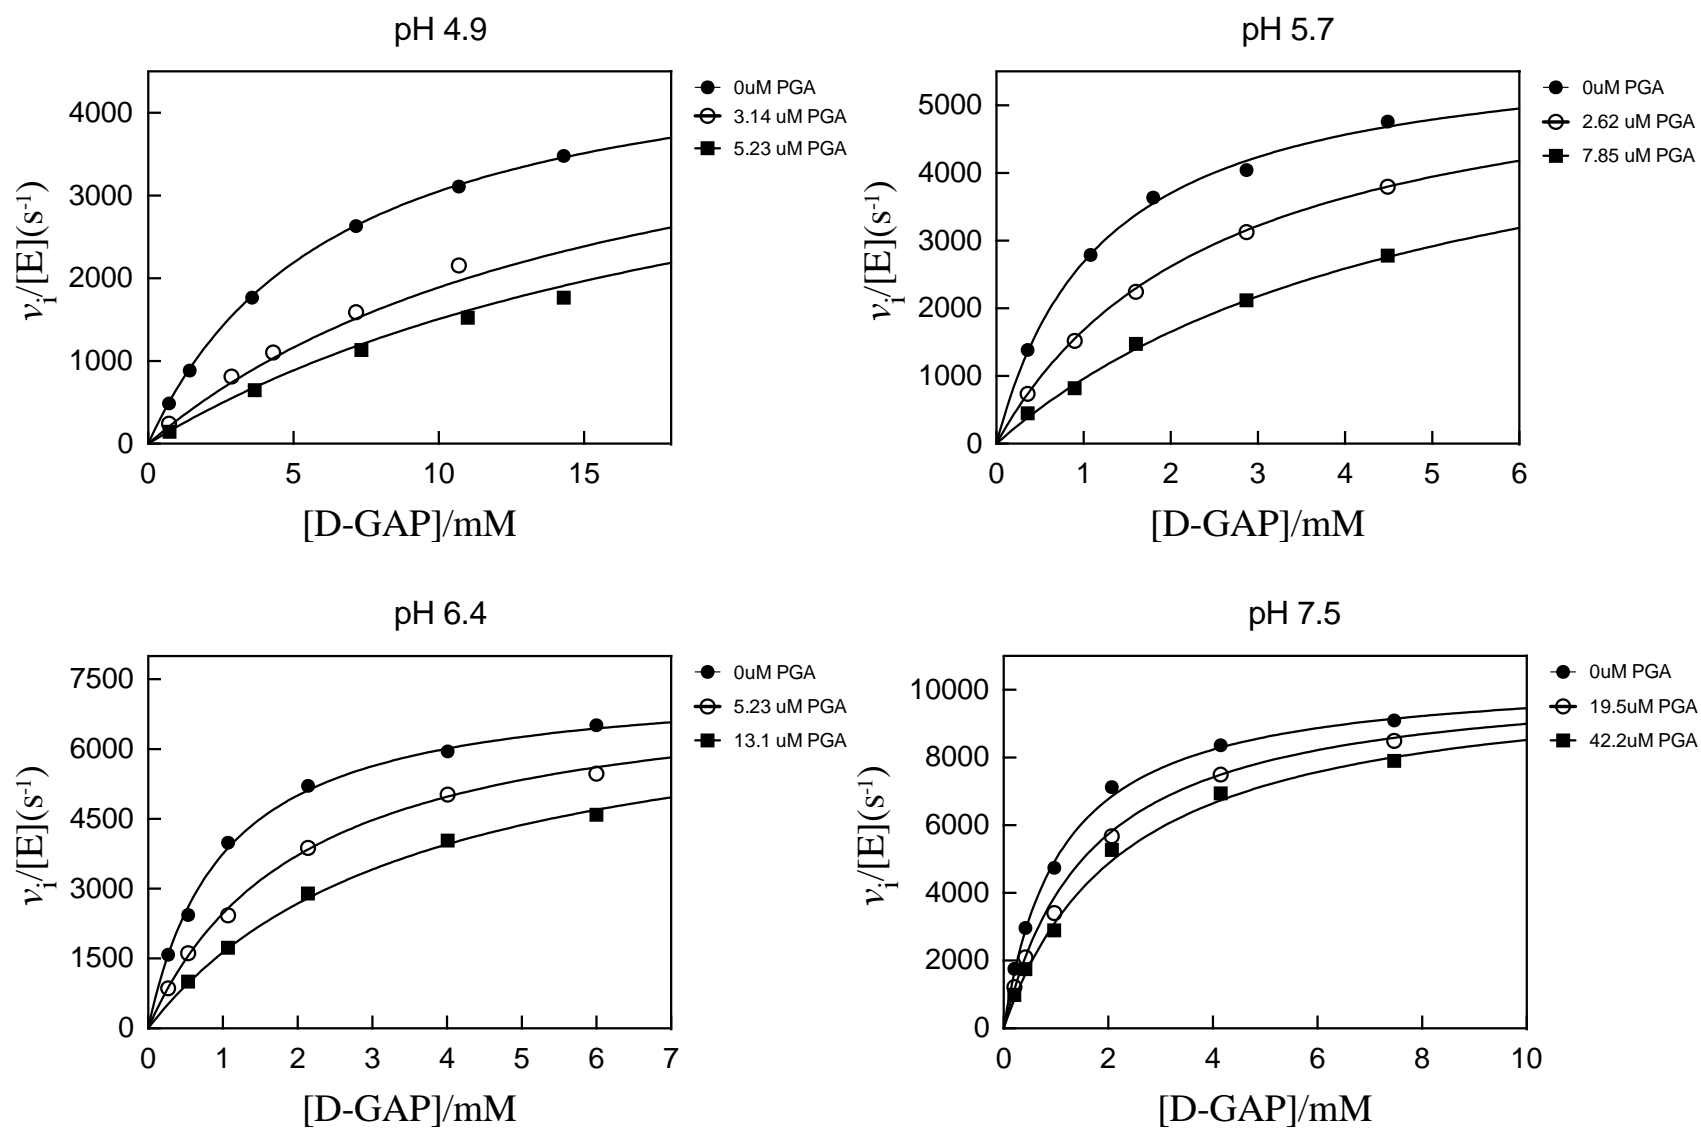

FIGURE S1 (CONTINUED)

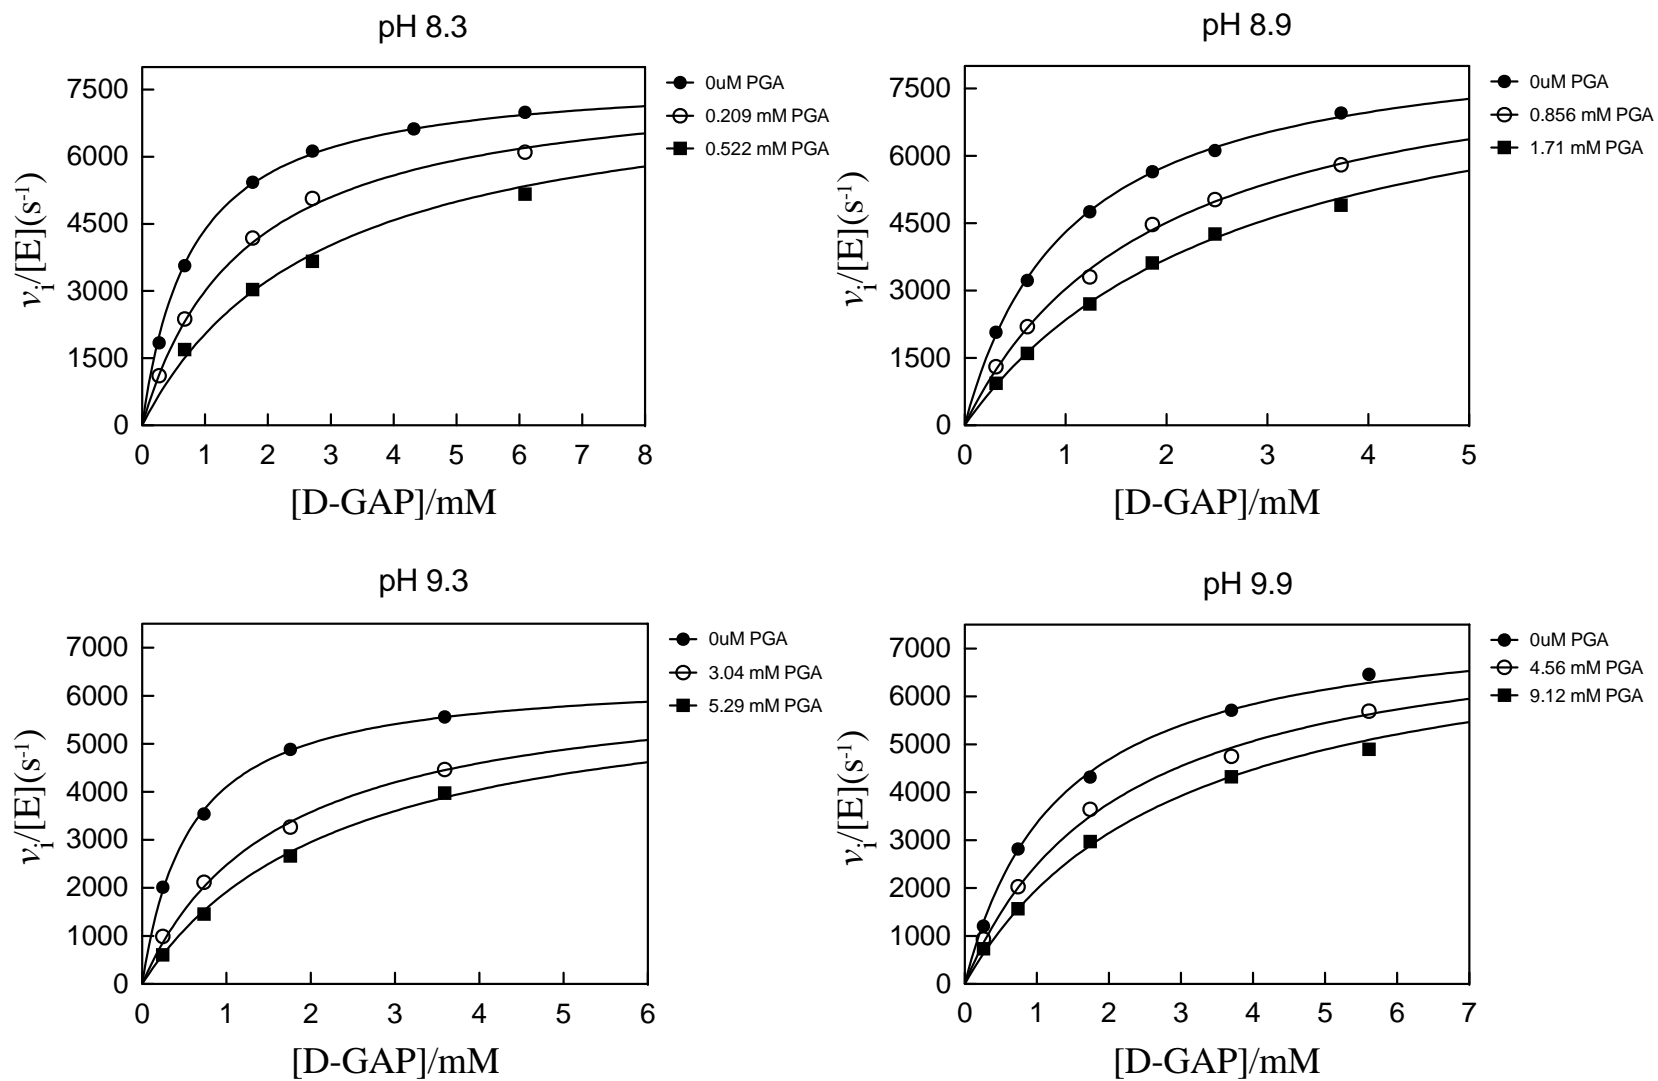

FIGURE S2 [Y208T yTIM]

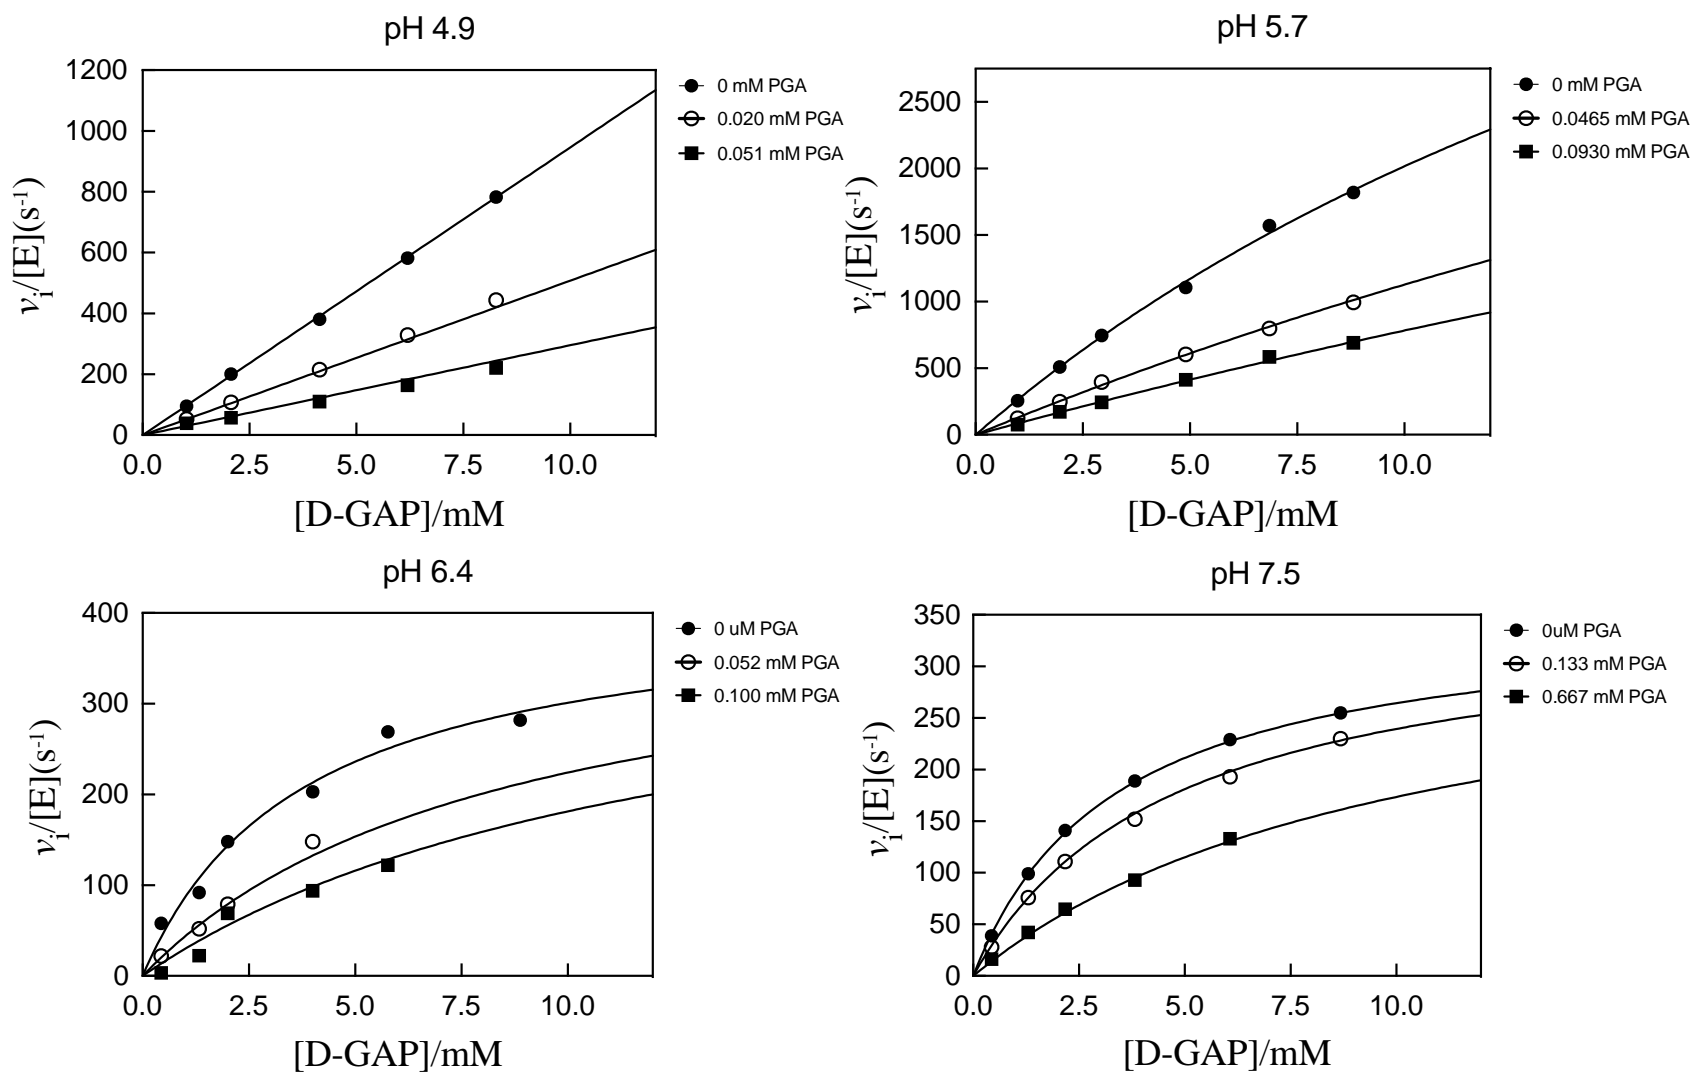

FIGURE S2 (CONTINUED)

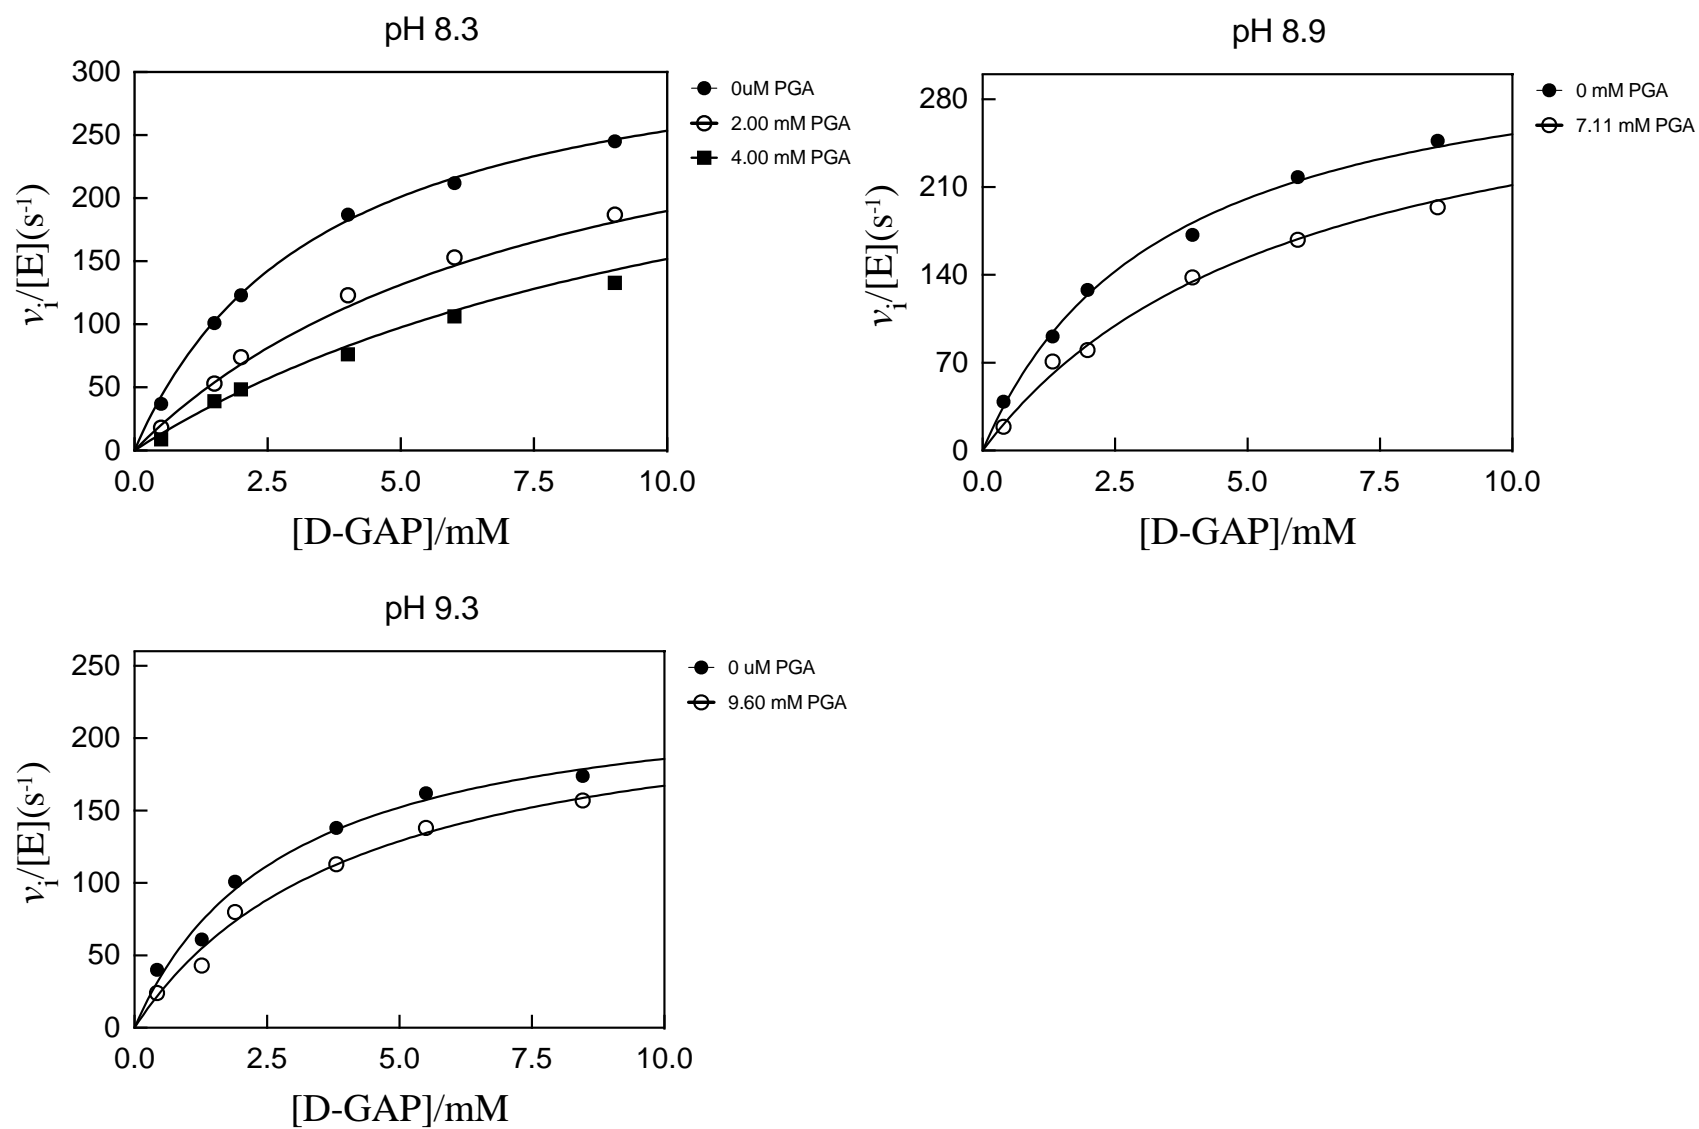

FIGURE S3 [Y208S yTIM]

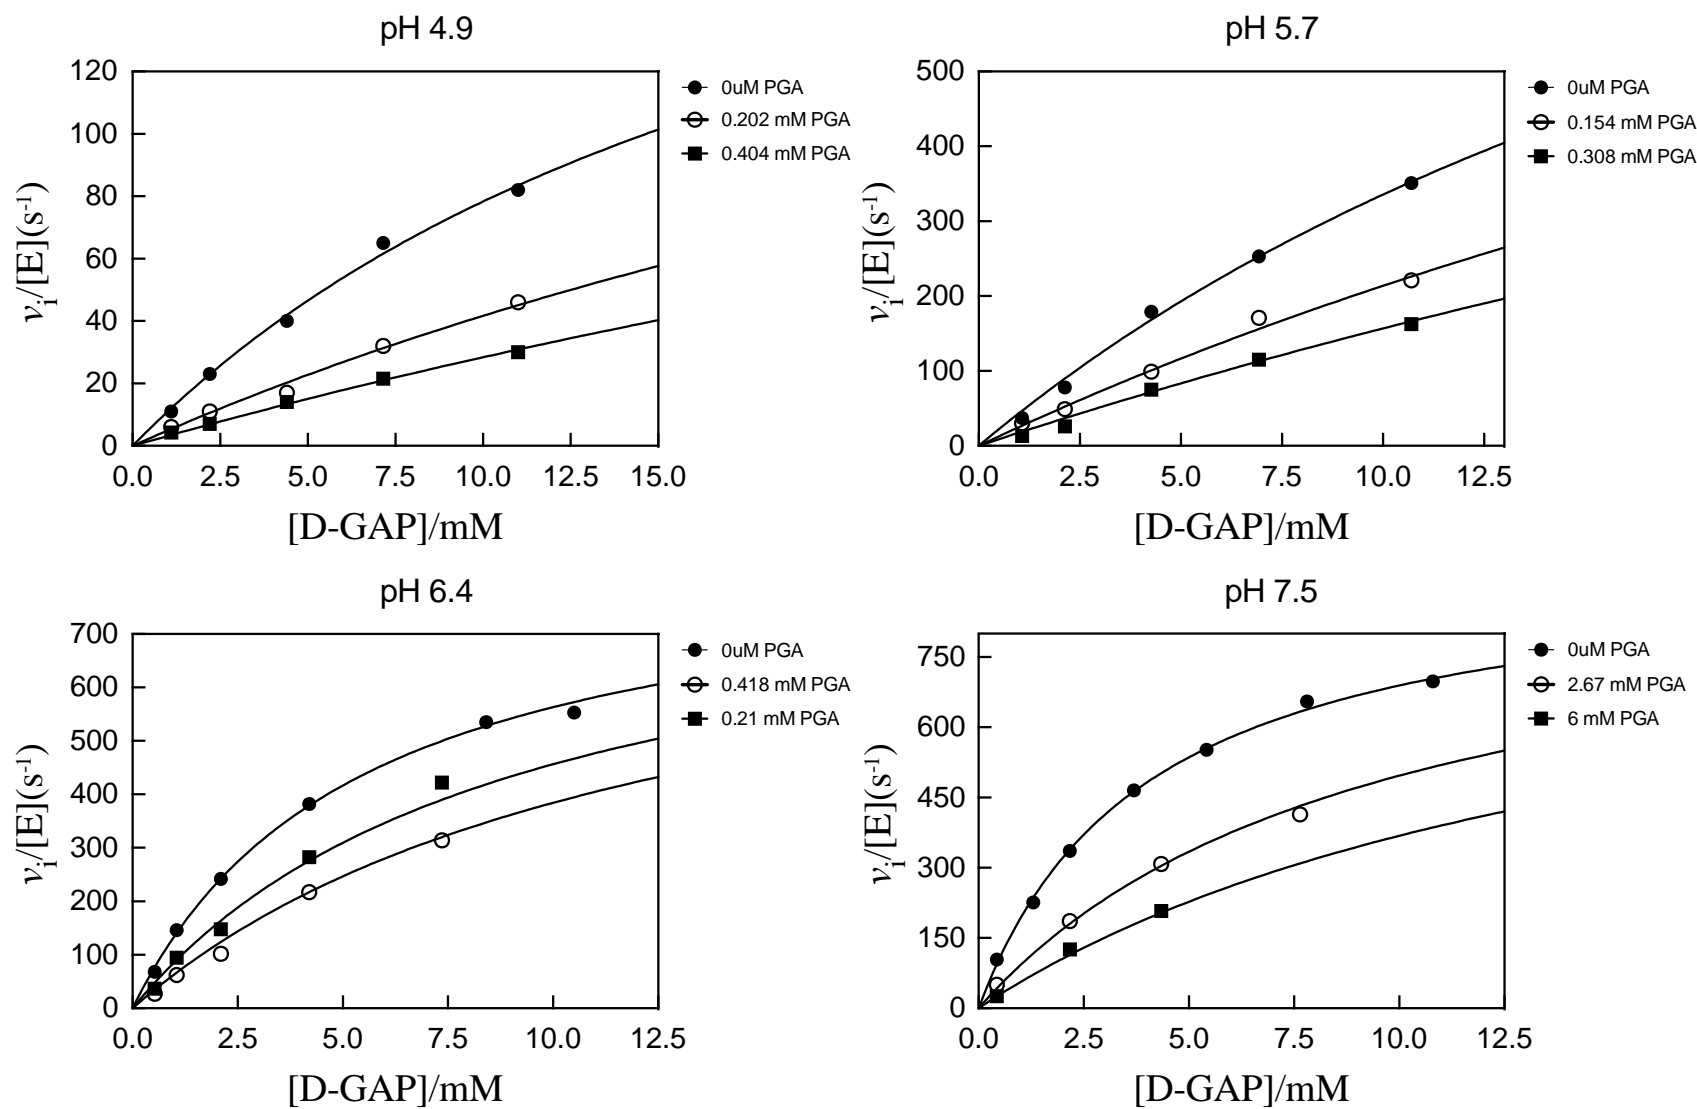

FIGURE S3 (CONTINUED)

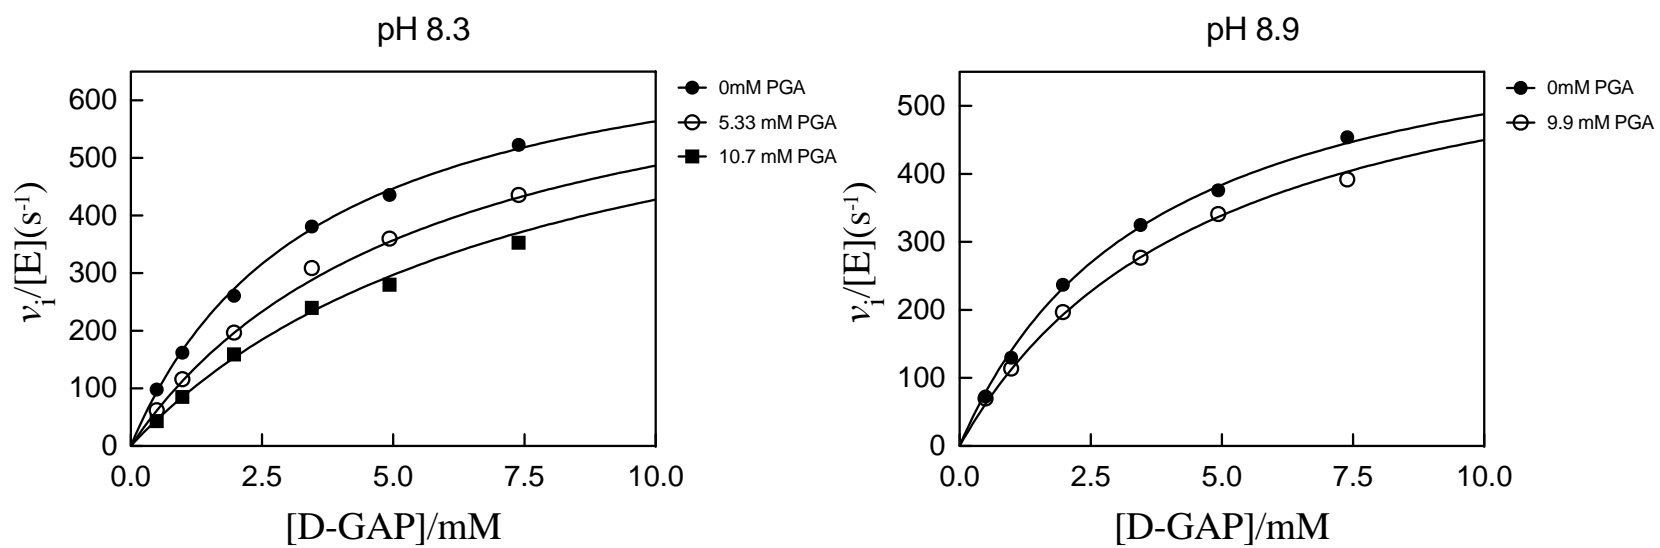



FIGURE S4 [Y208A yTIM]

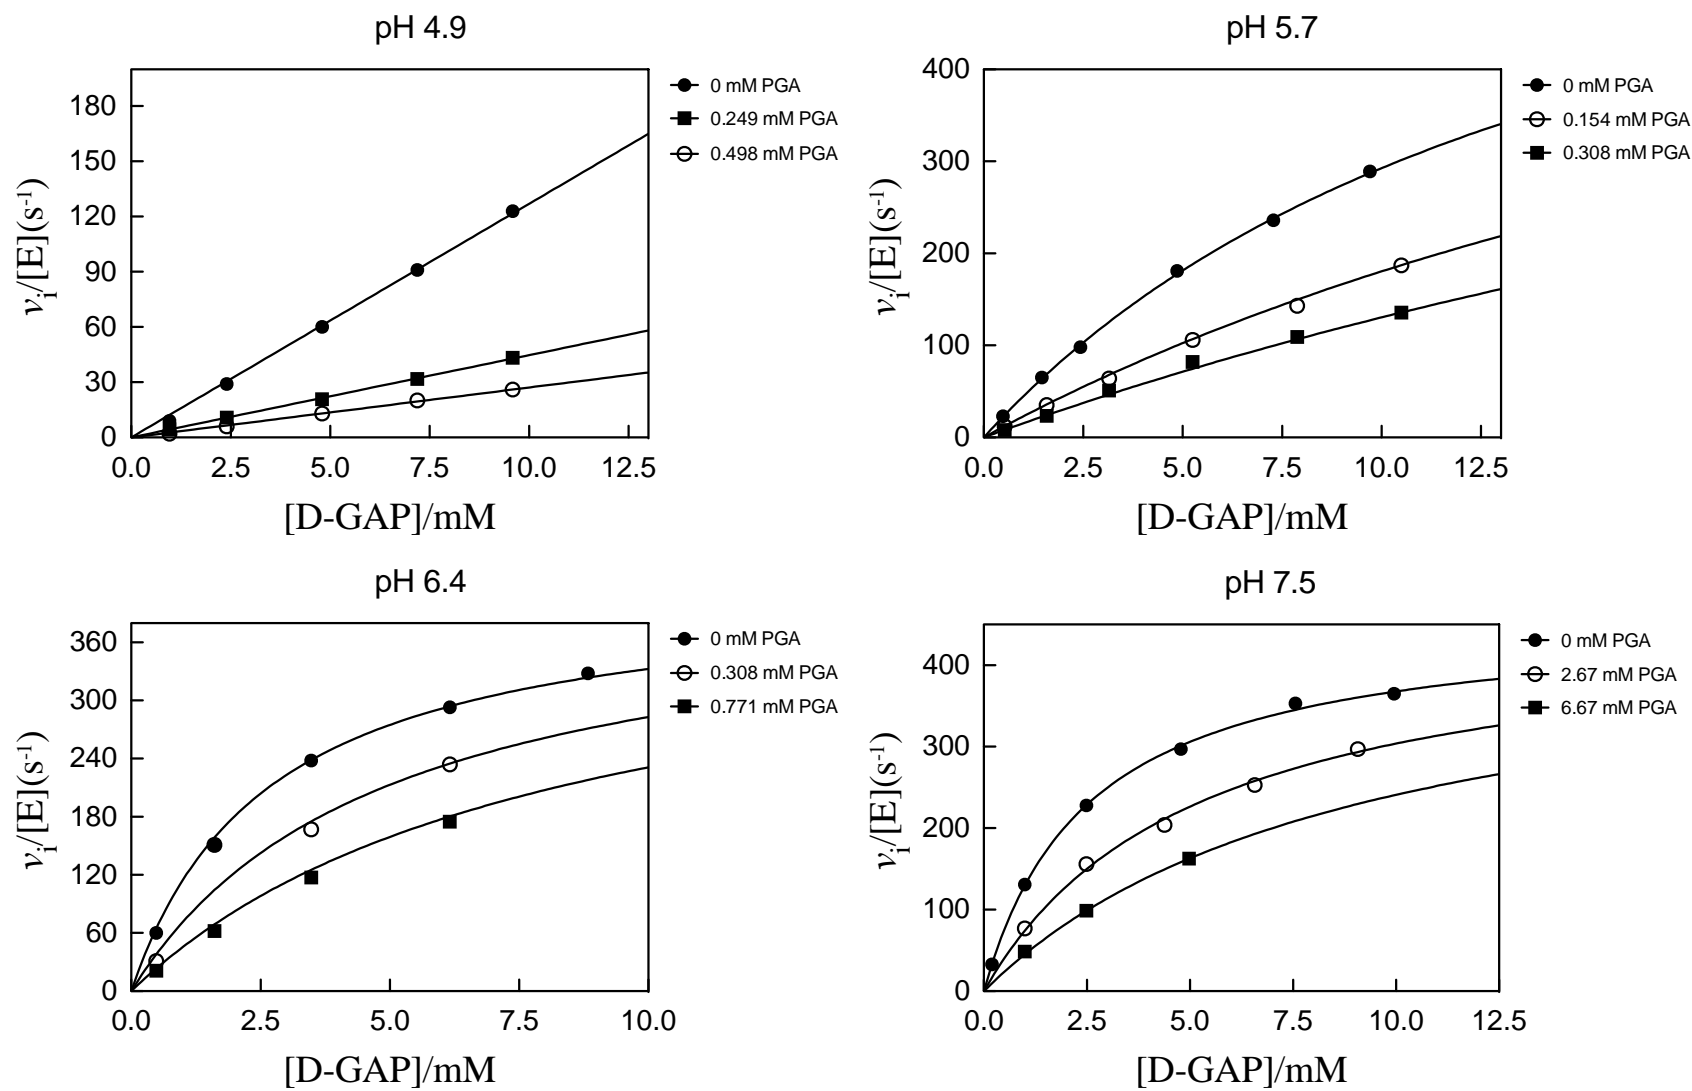

FIGURE S4 (CONTINUED)

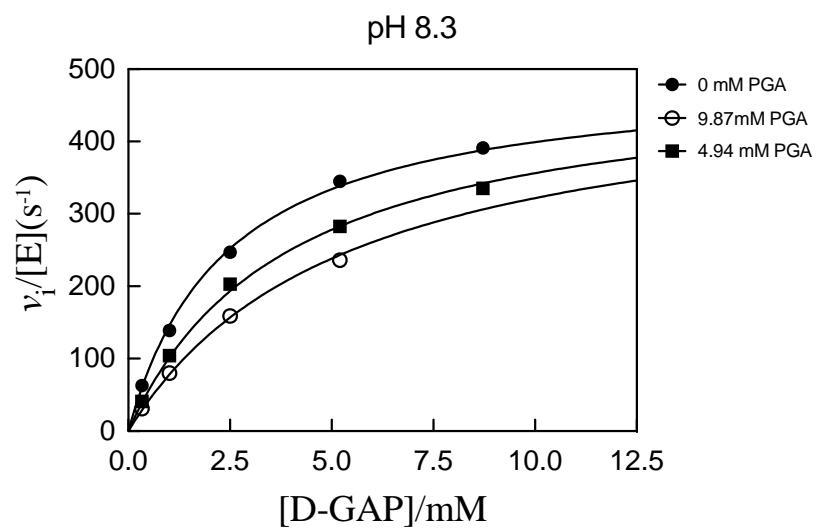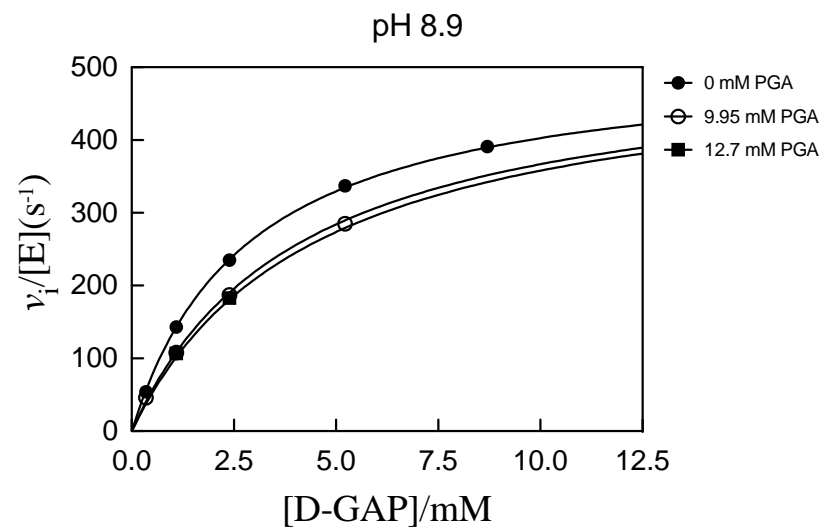

FIGURE S5 [Y208F yTIM]

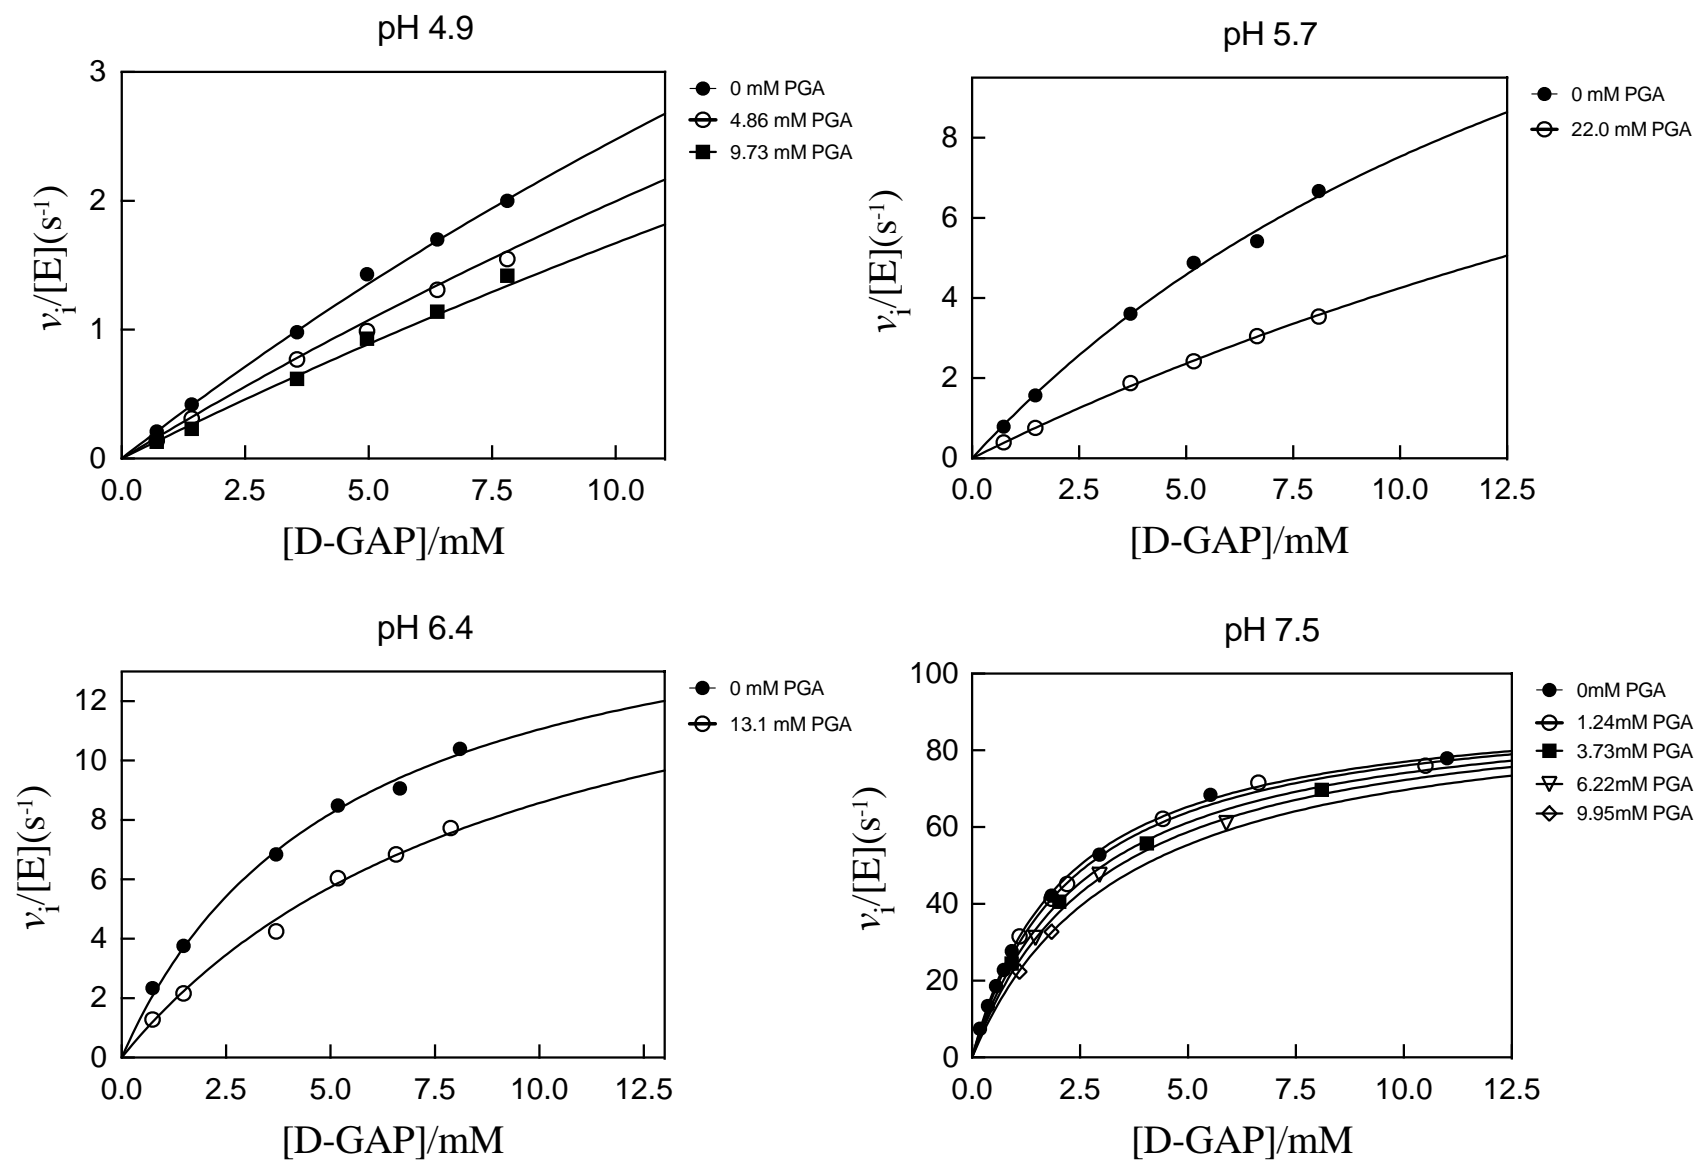

FIGURE S5 (CONTINUED)

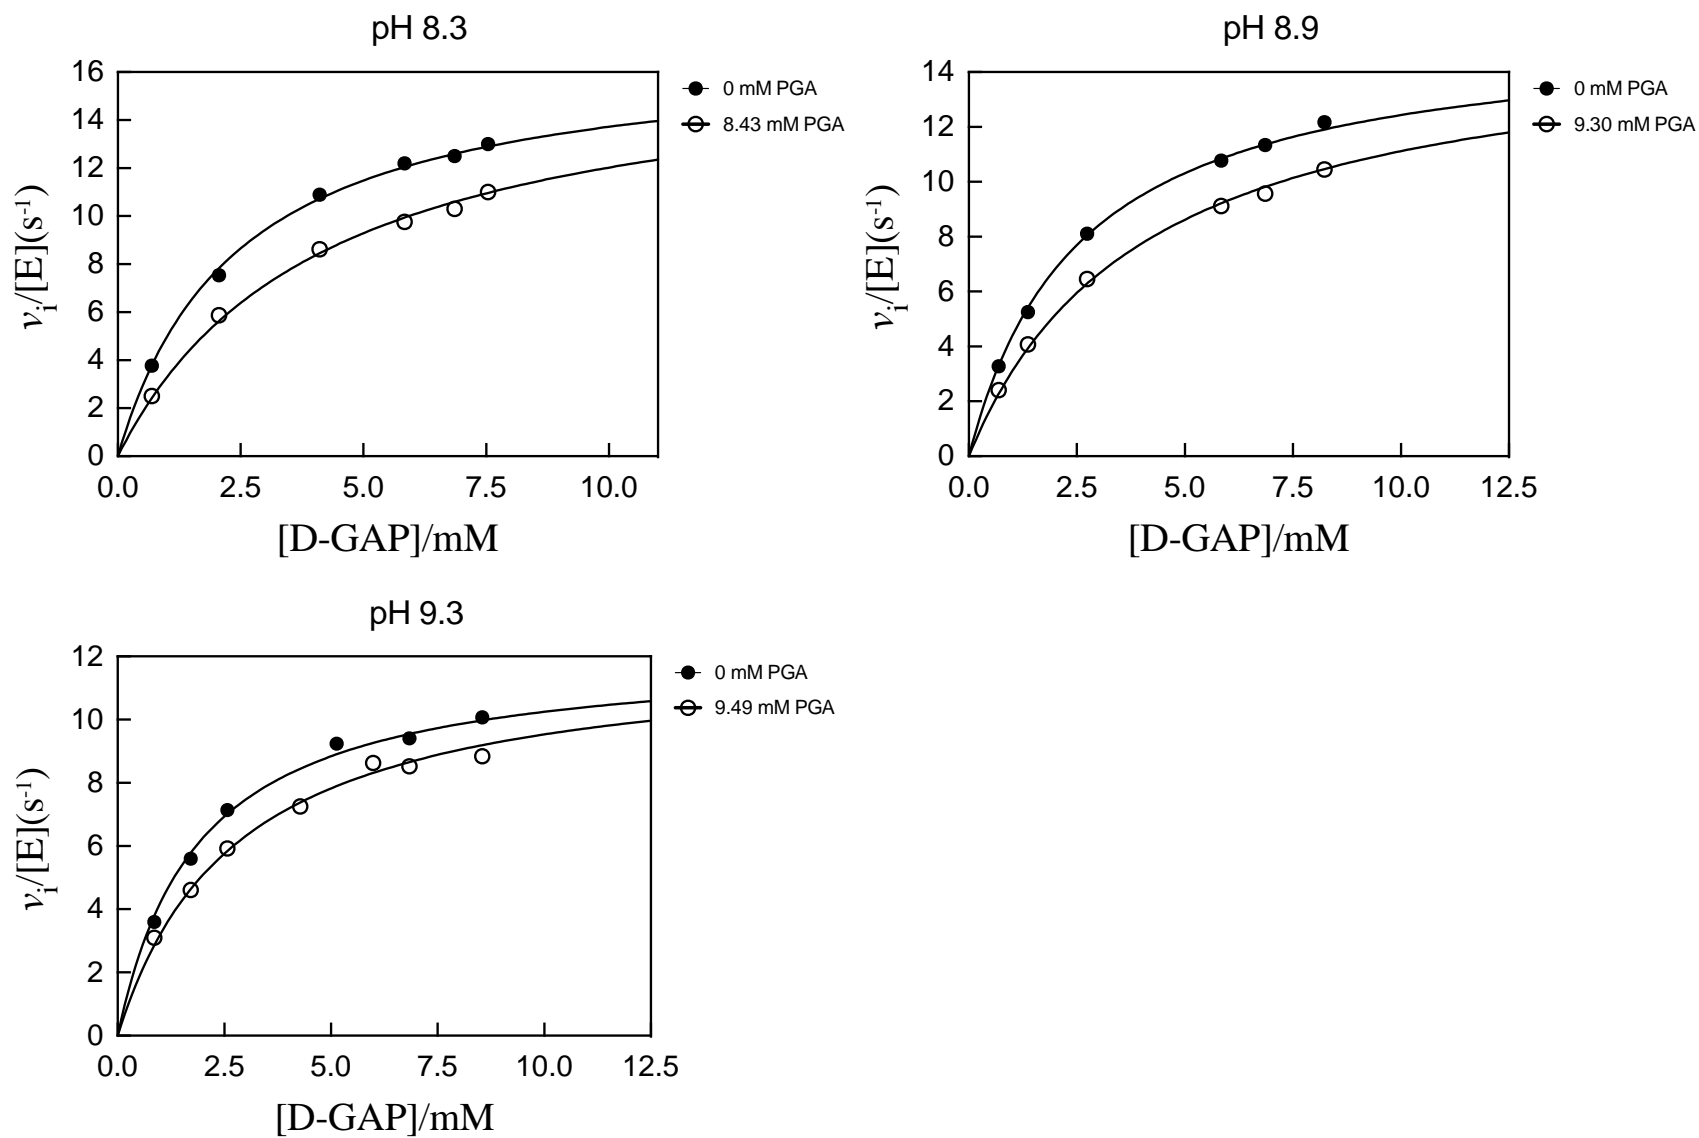

FIGURE S6 [S211A yTIM]

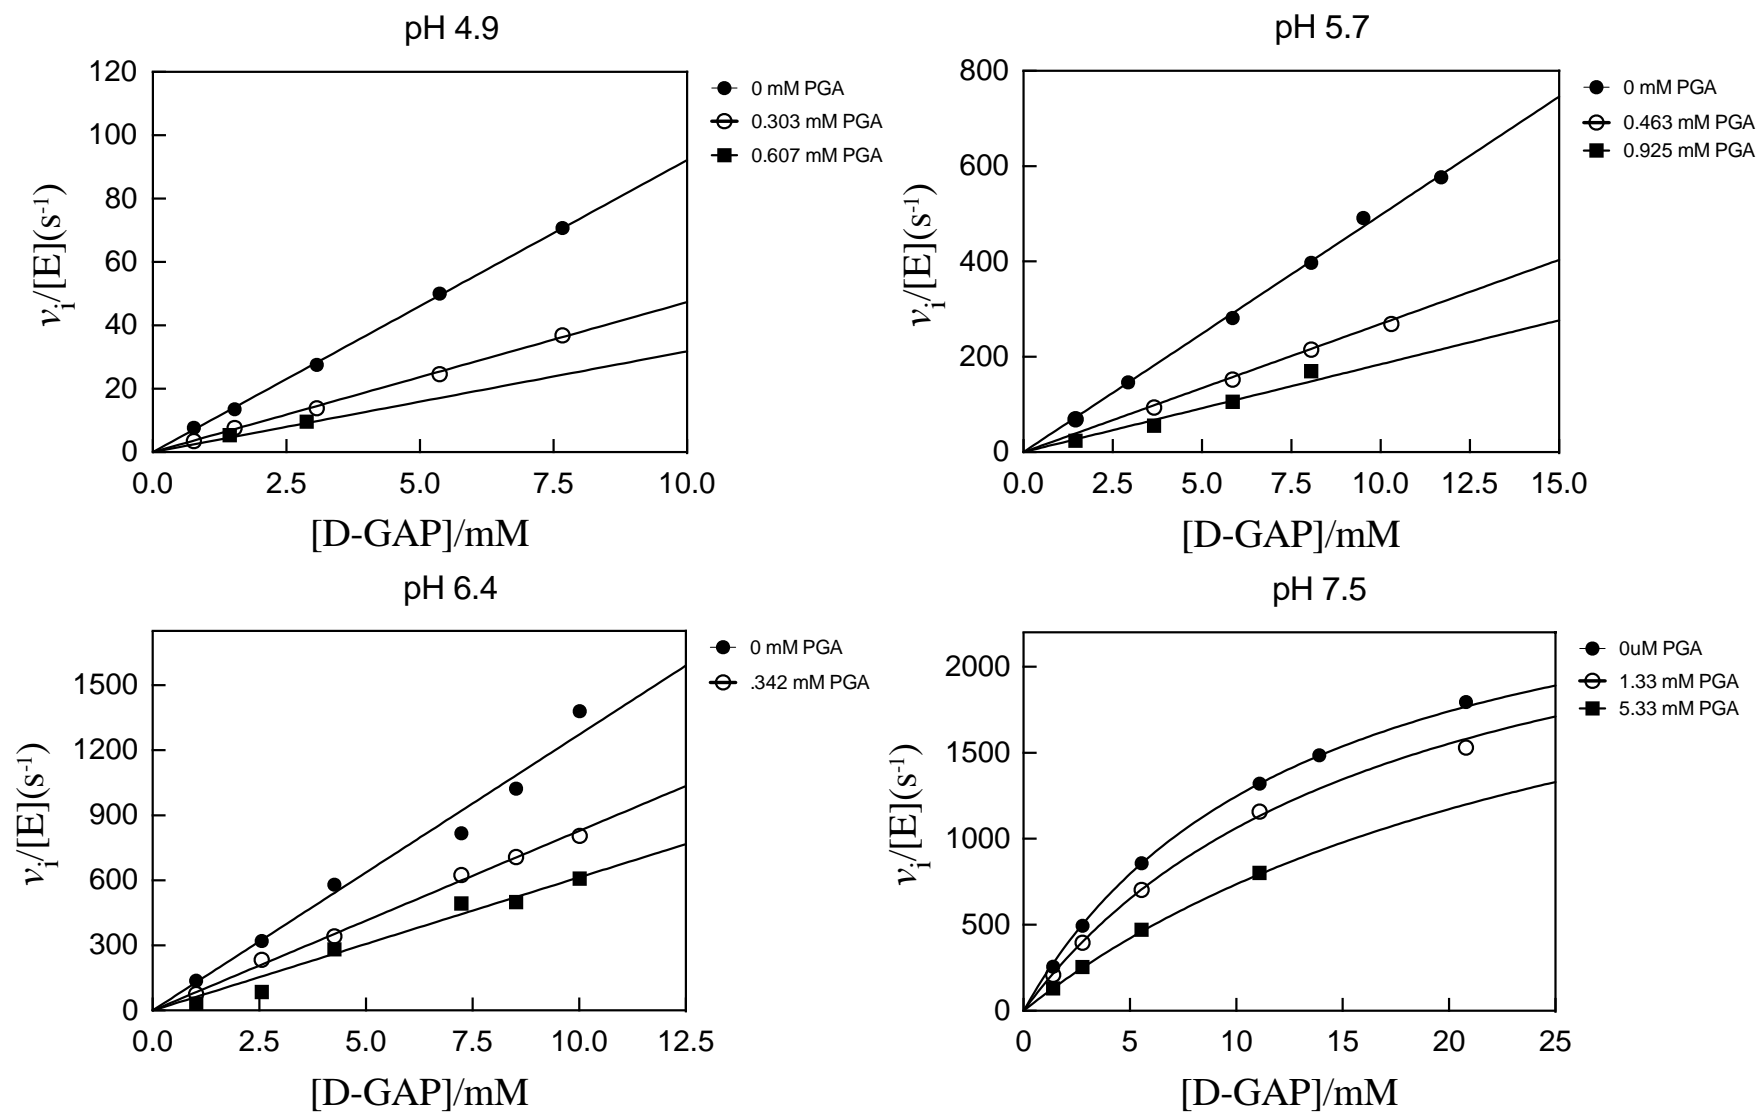

FIGURE S6 (CONTINUED)

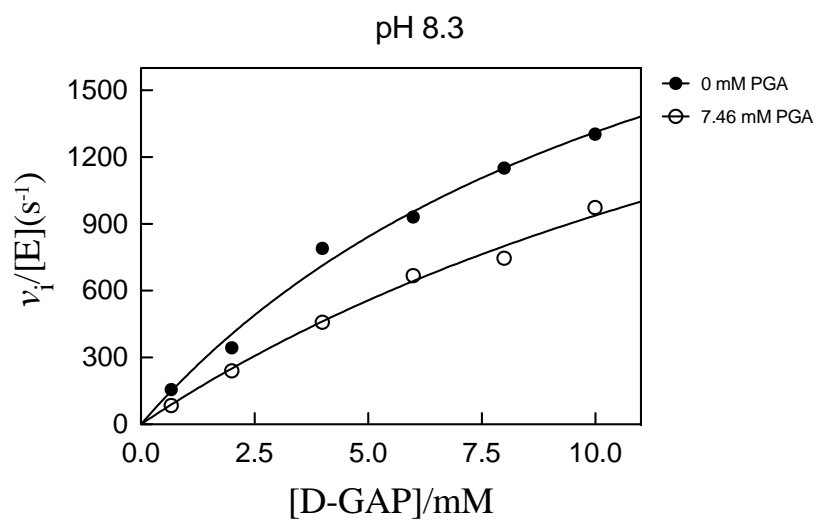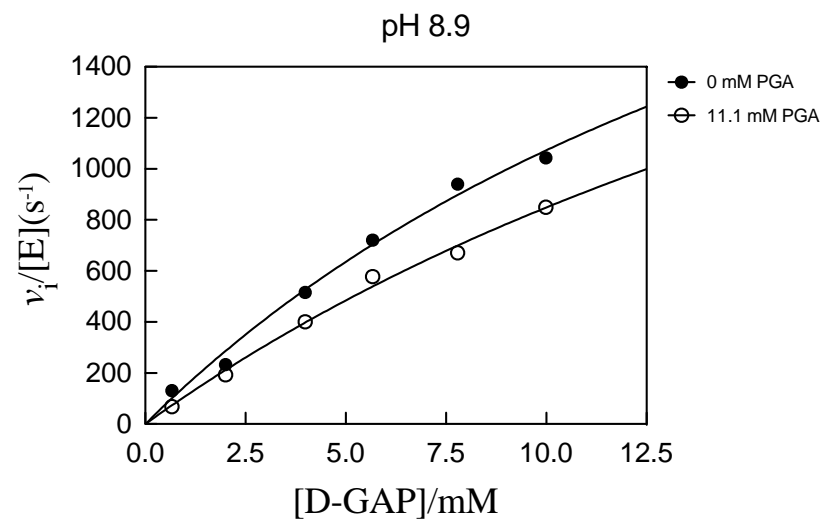

FIGURE S7 [S211G yTIM]

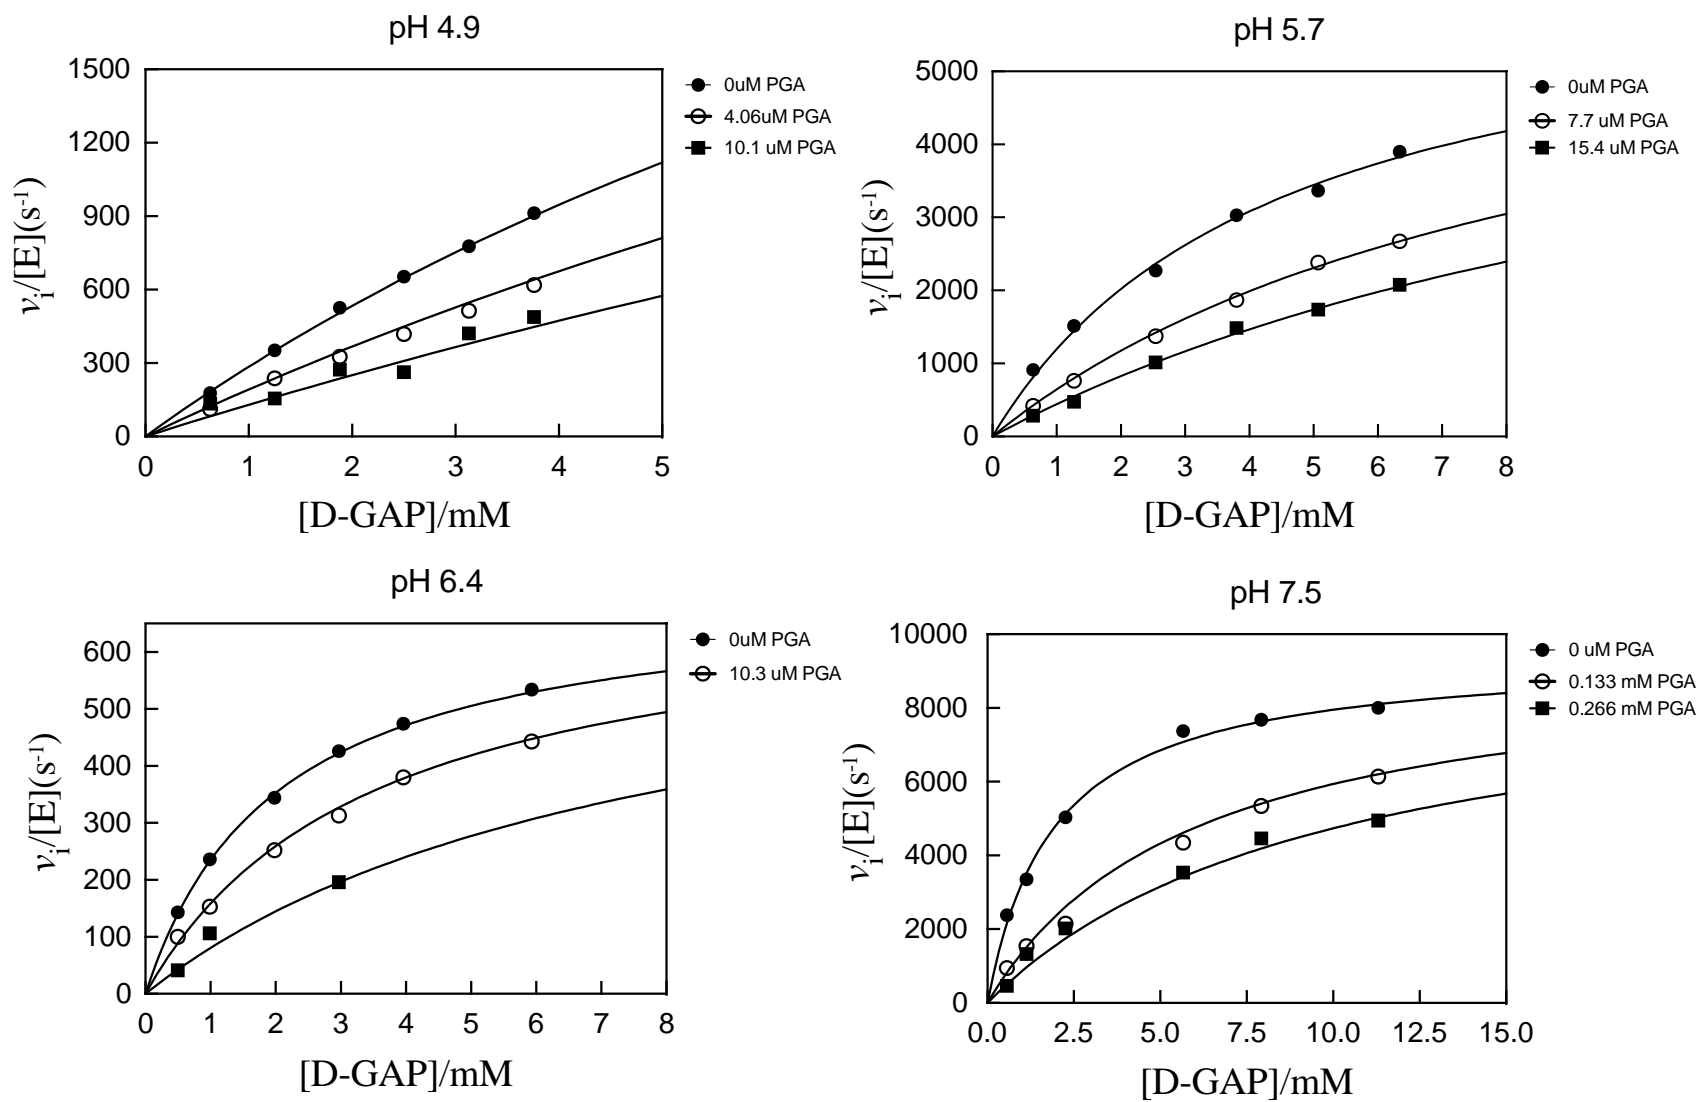

FIGURE S7 (CONTINUED)

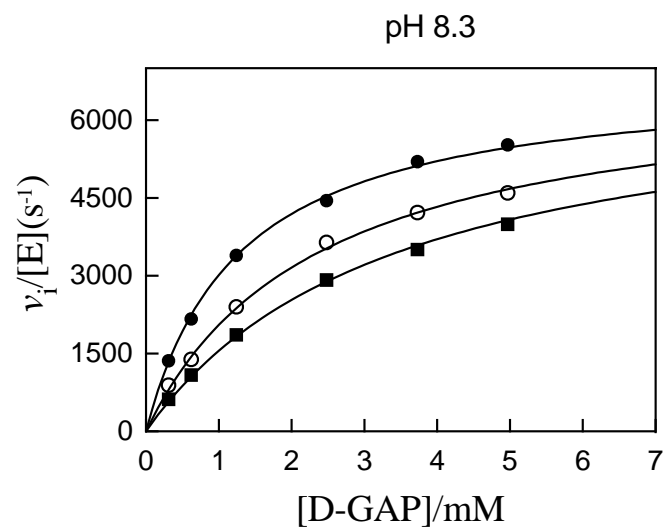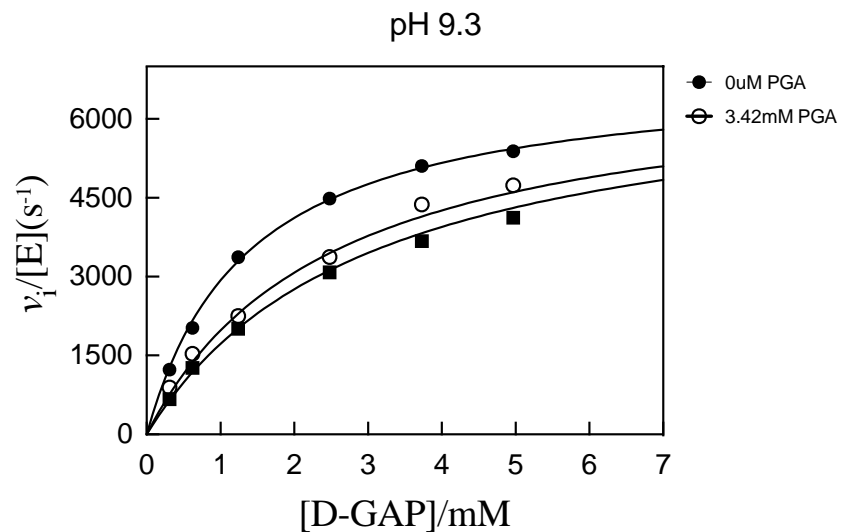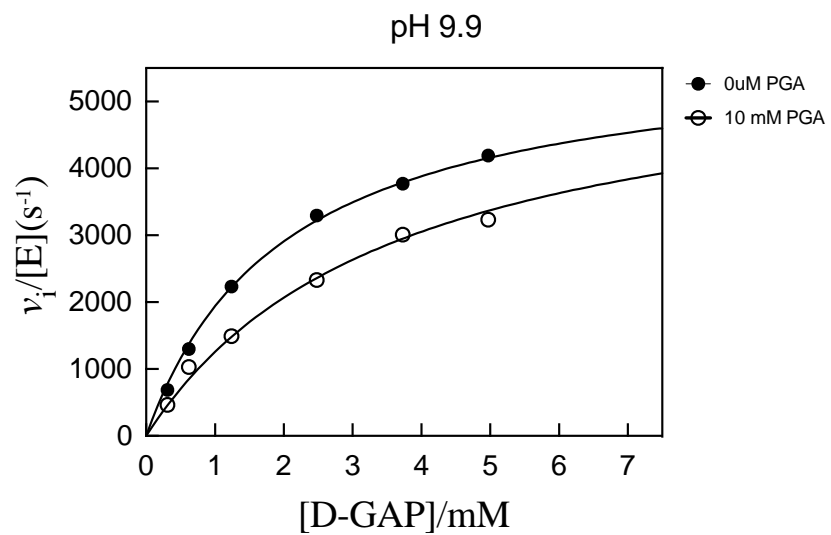



FIGURE S8 [Y208T/S221G yTIM]

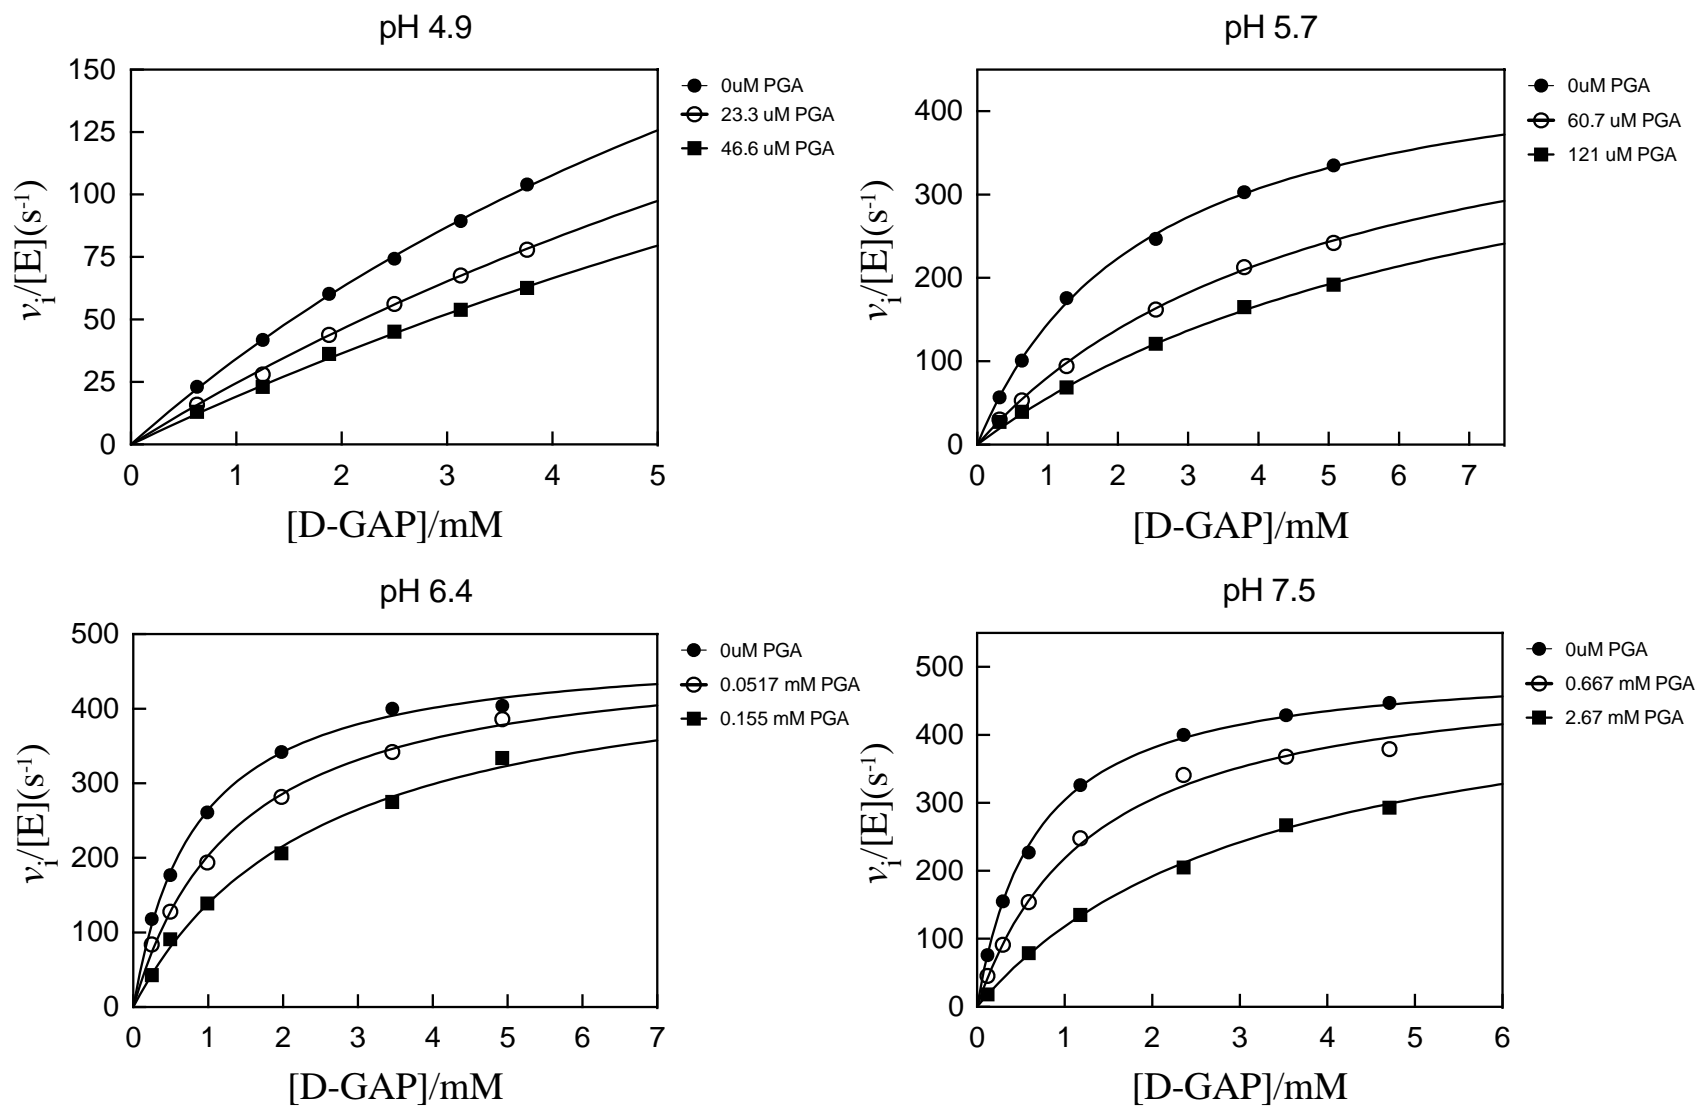

FIGURE S8 (CONTINUED)

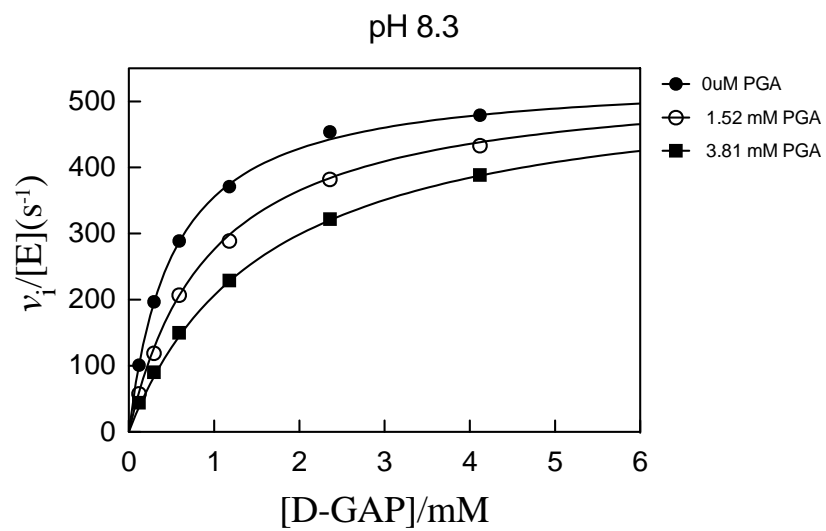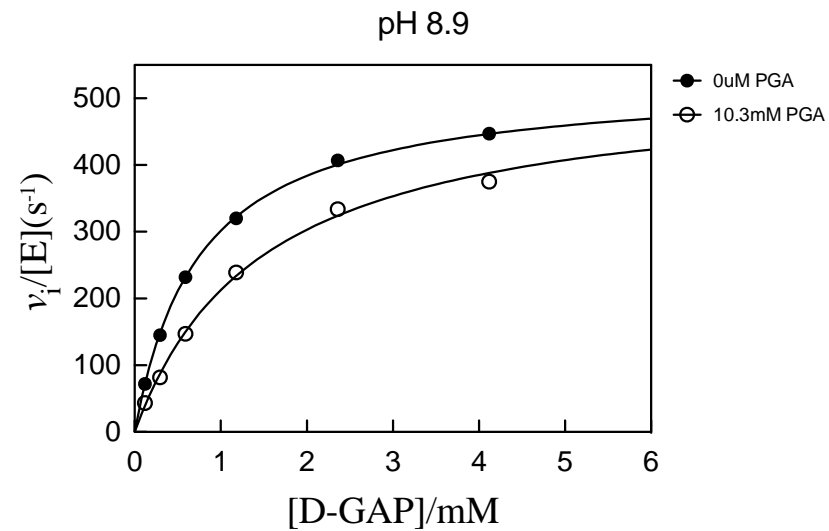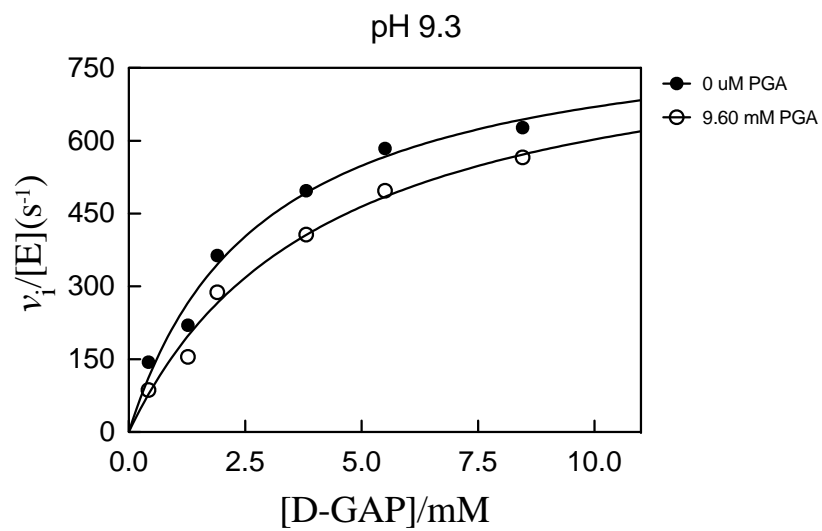

FIGURE S9 [Wildtype *c*TIM]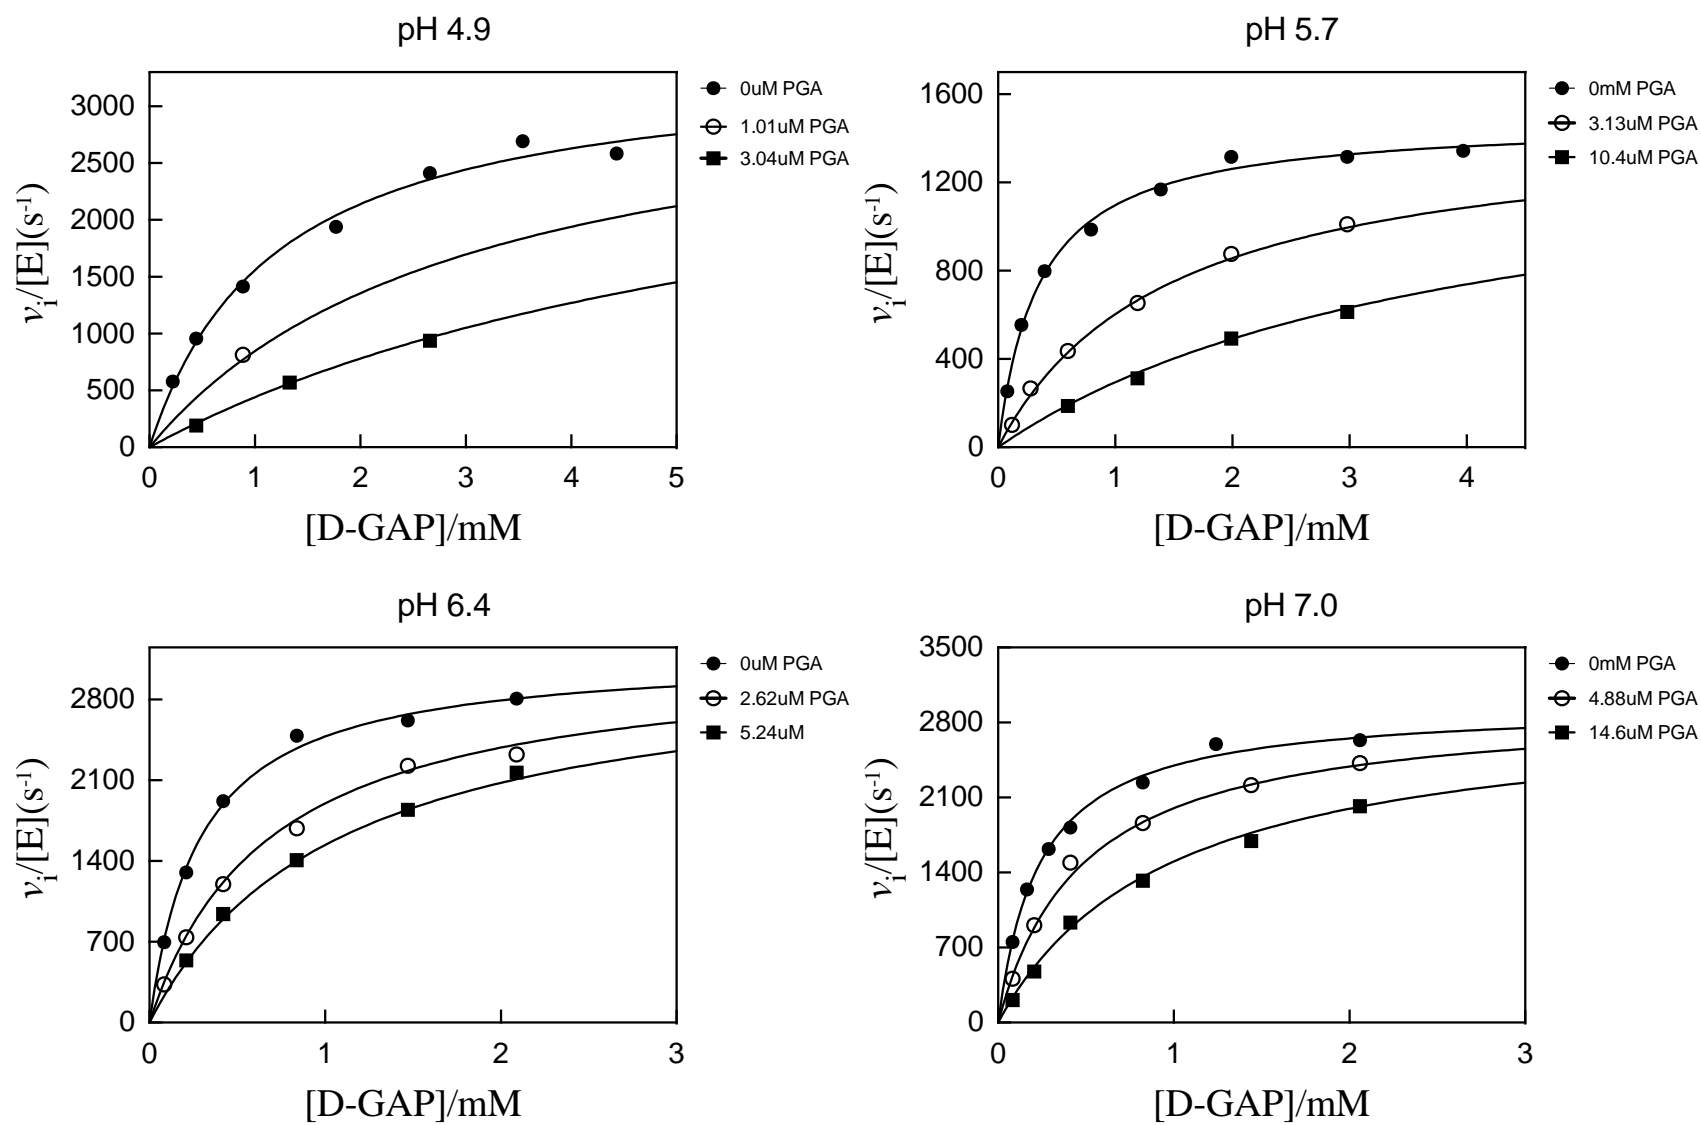

FIGURE S9 (CONTINUED)

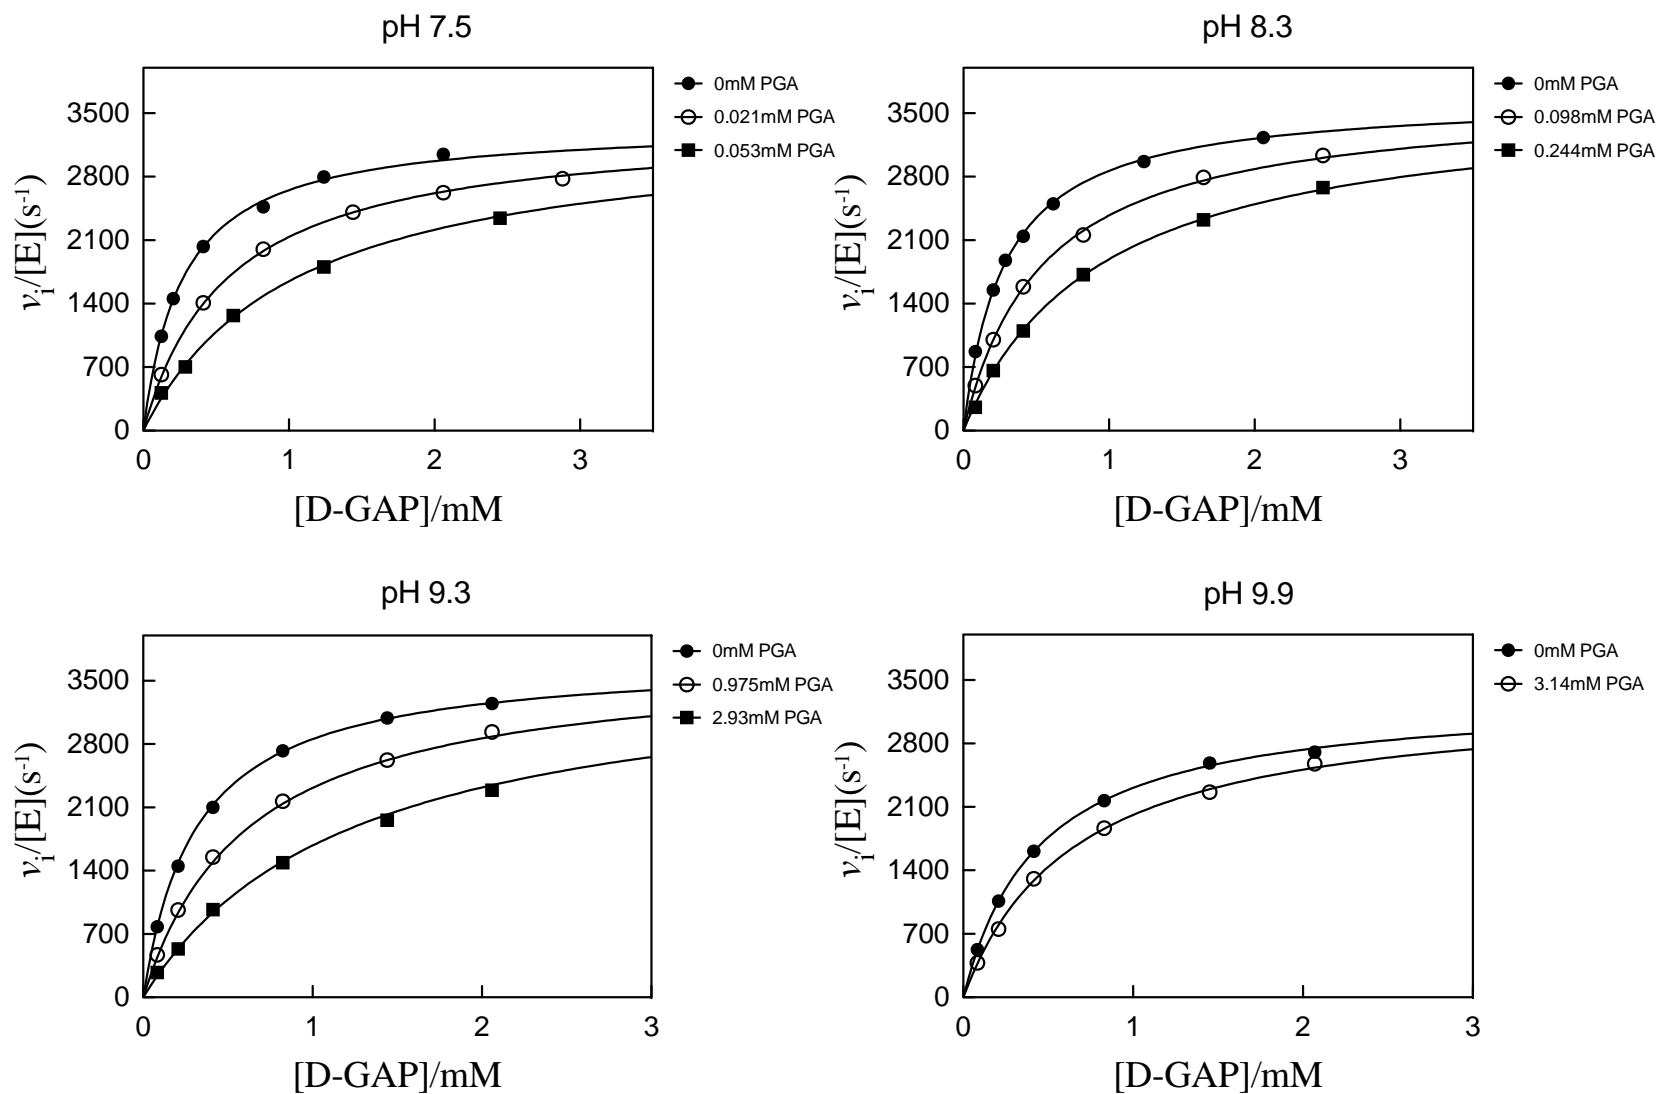

FIGURE S10 [L7R *c*TIM]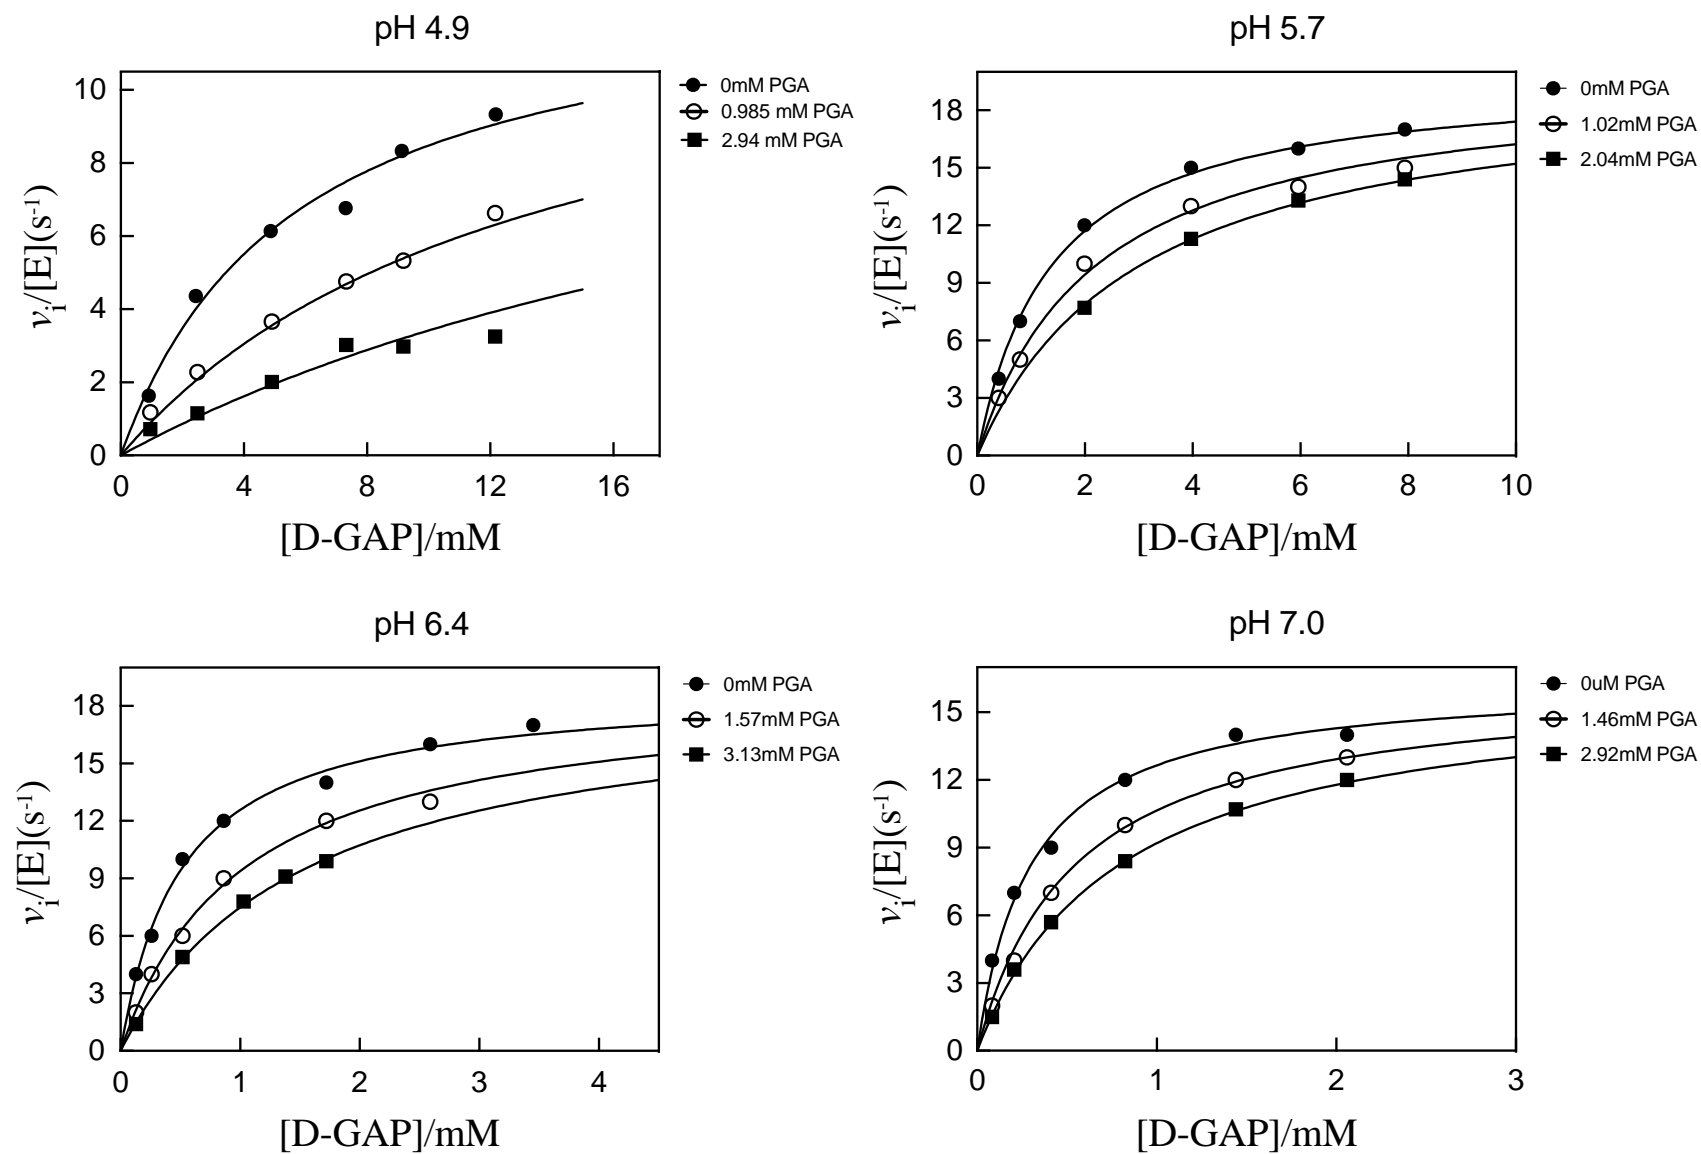

FIGURE S10 (CONTINUED)

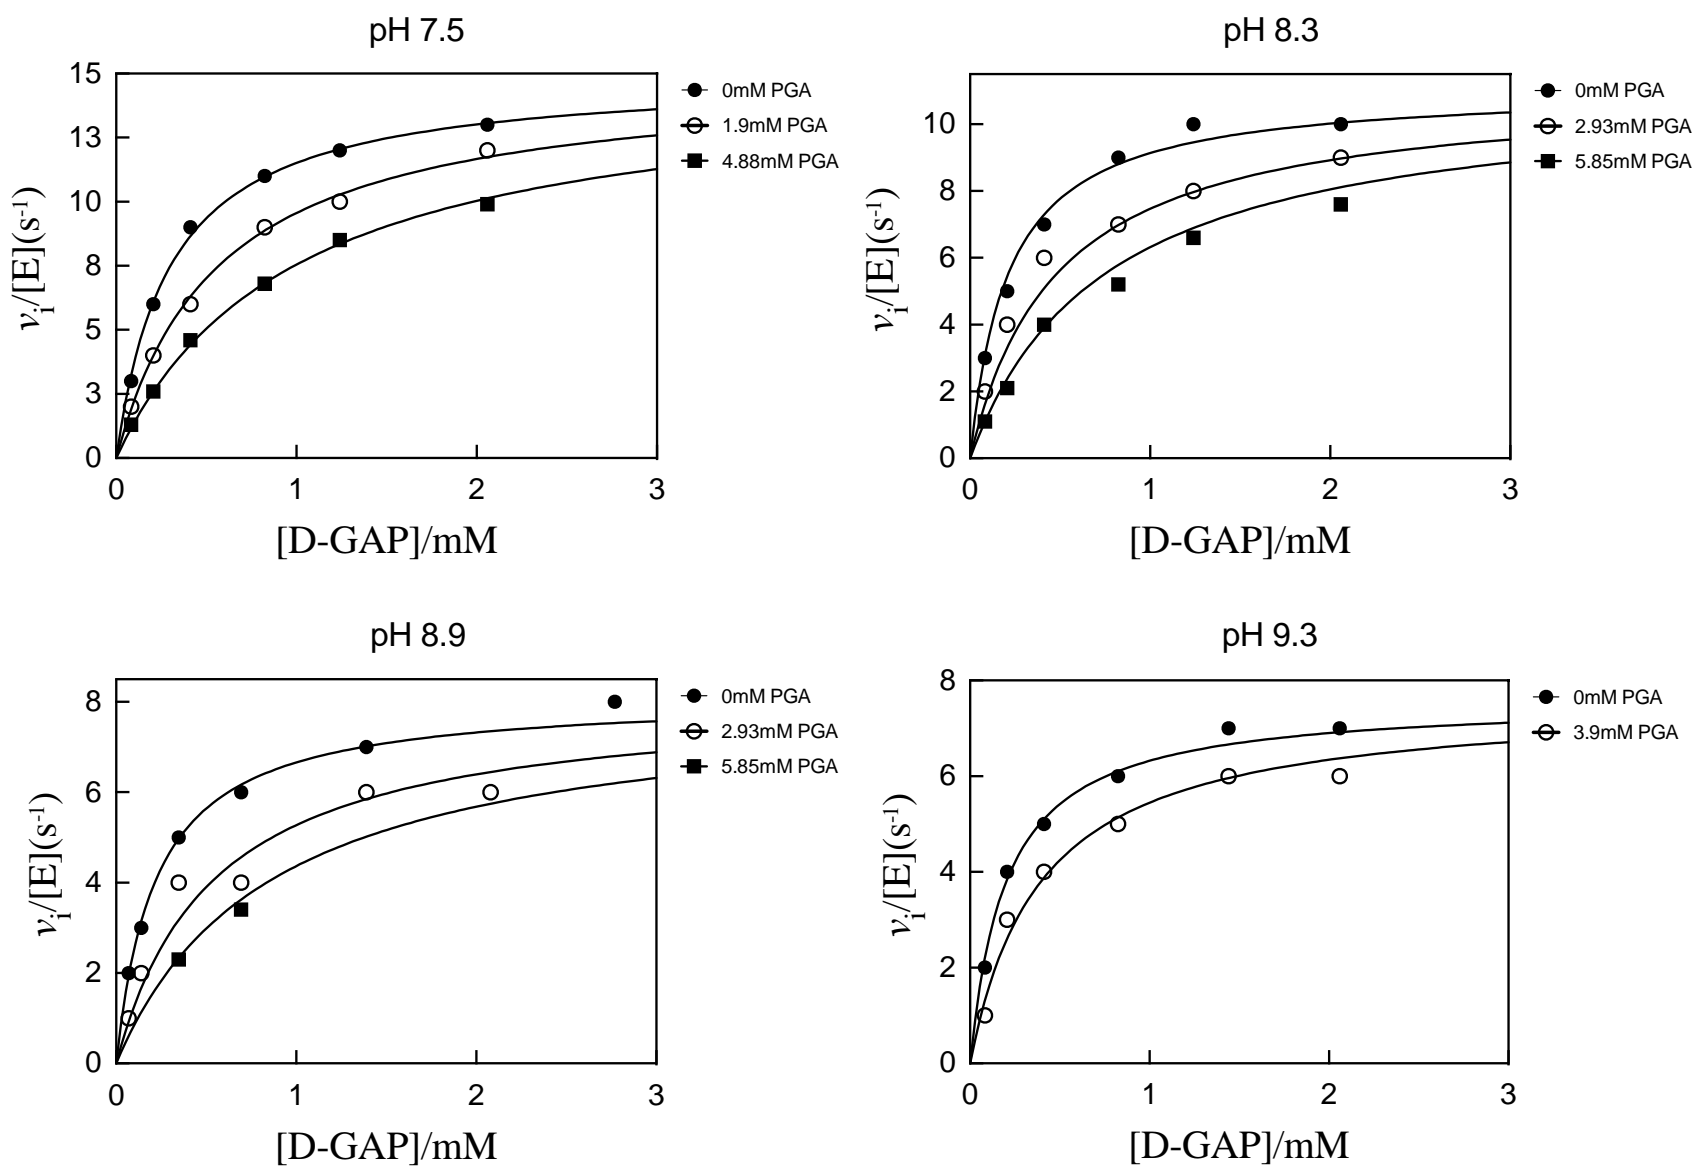

FIGURE S11 [P166A *Tbb*TIM]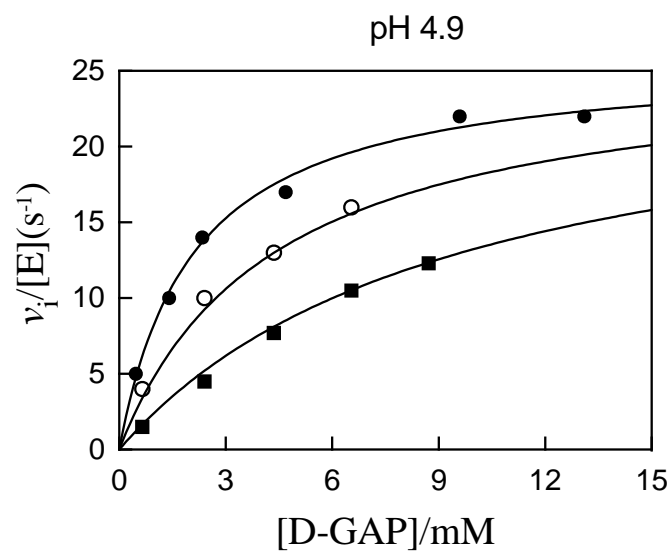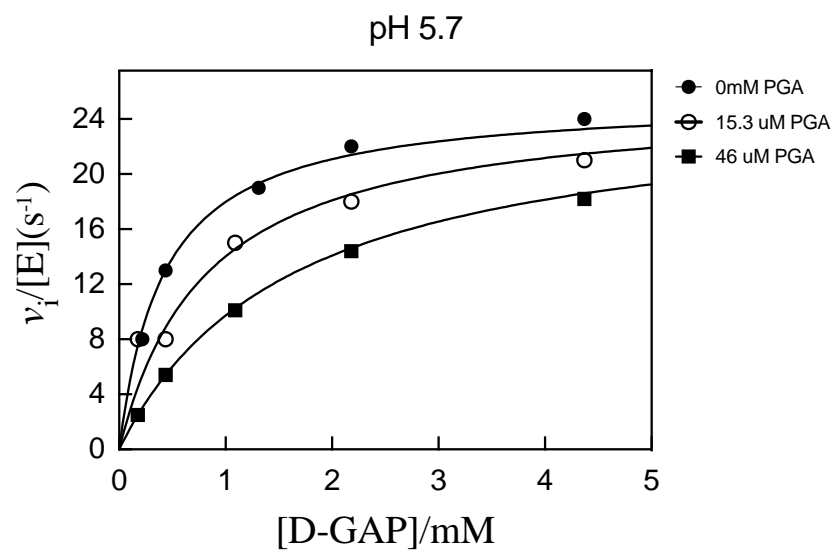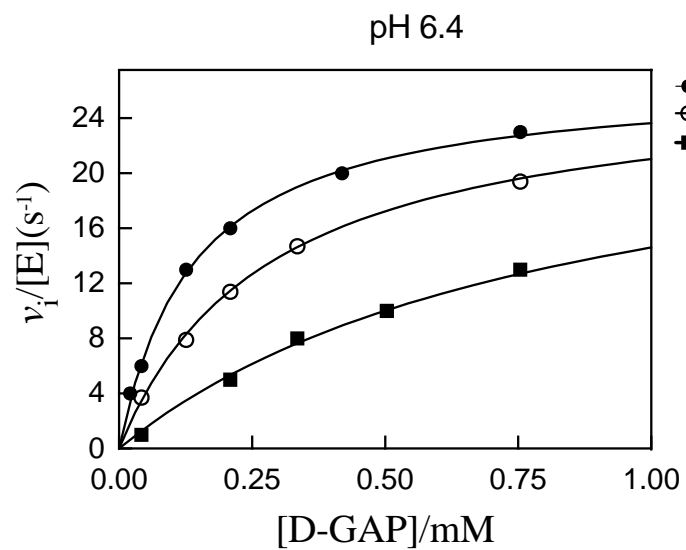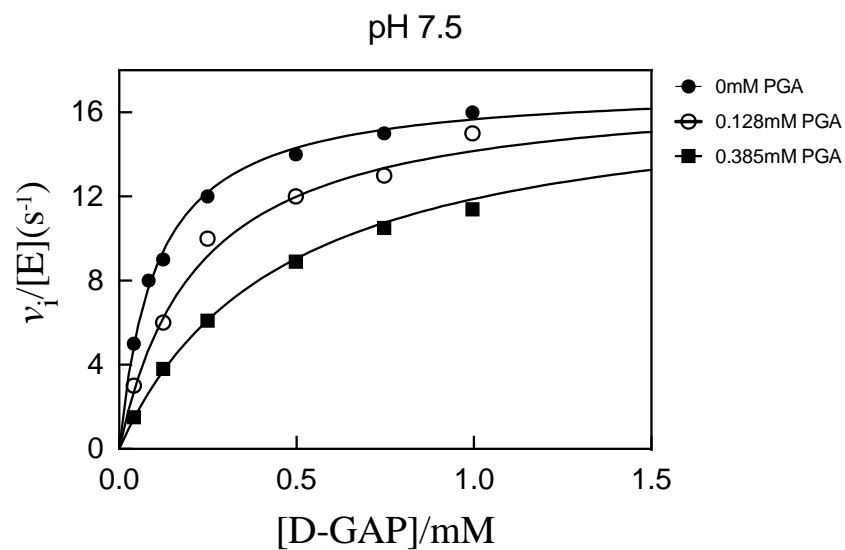

FIGURE S11 (CONTINUED)

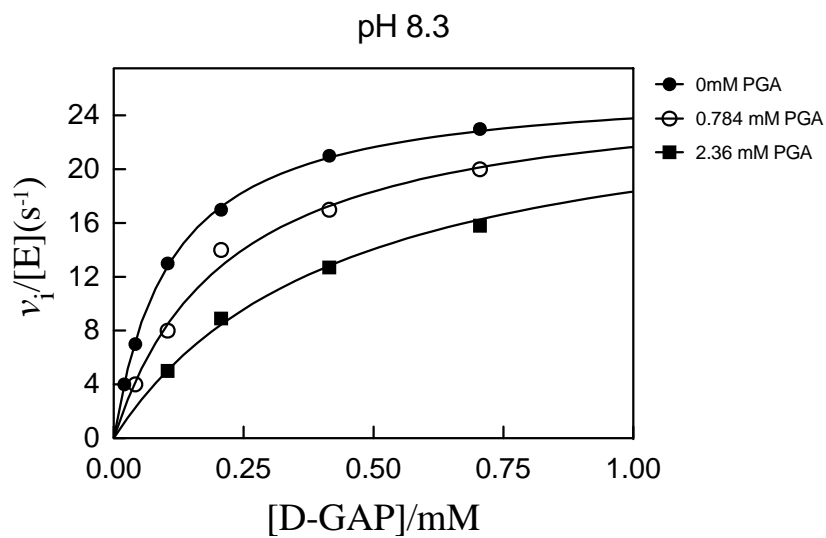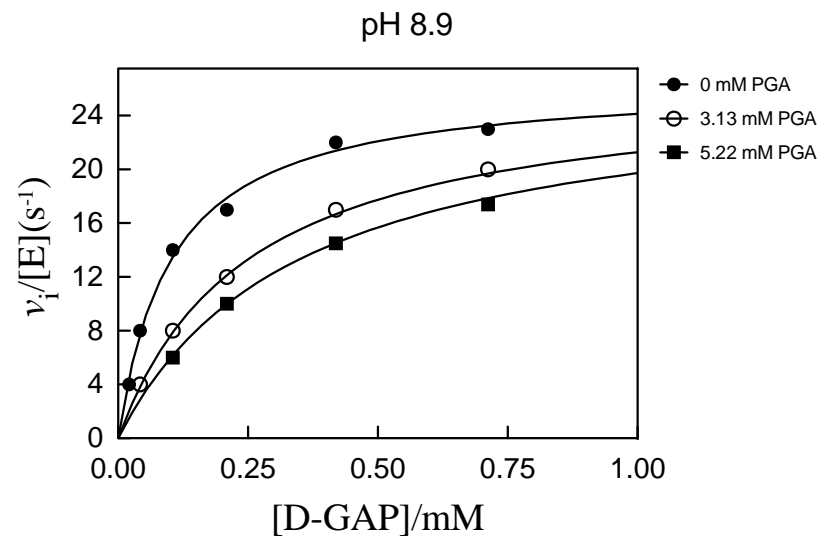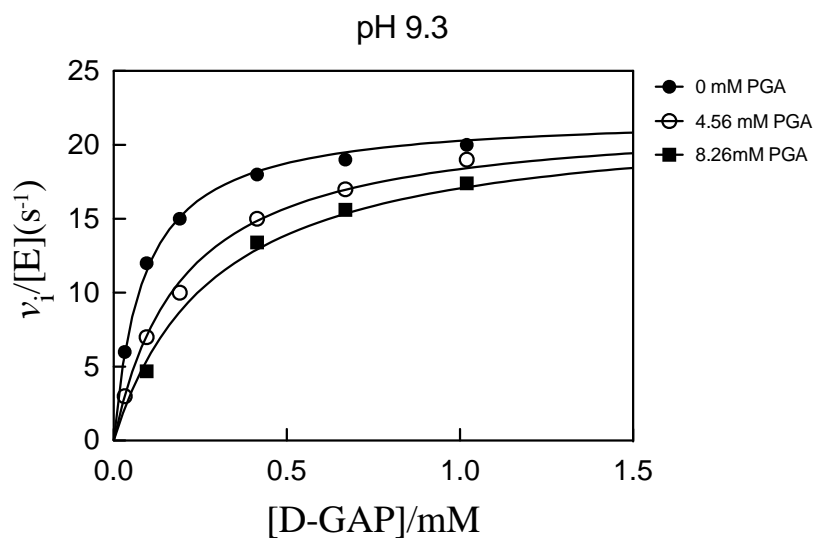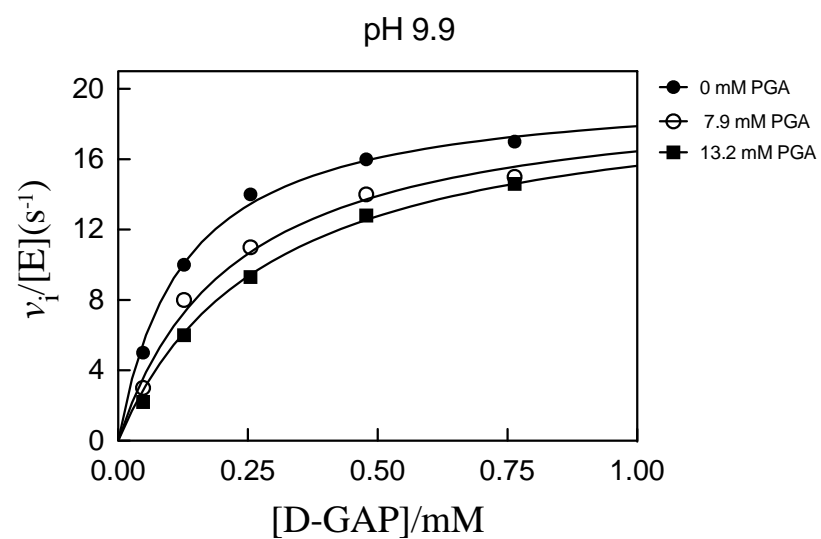



FIGURE S12

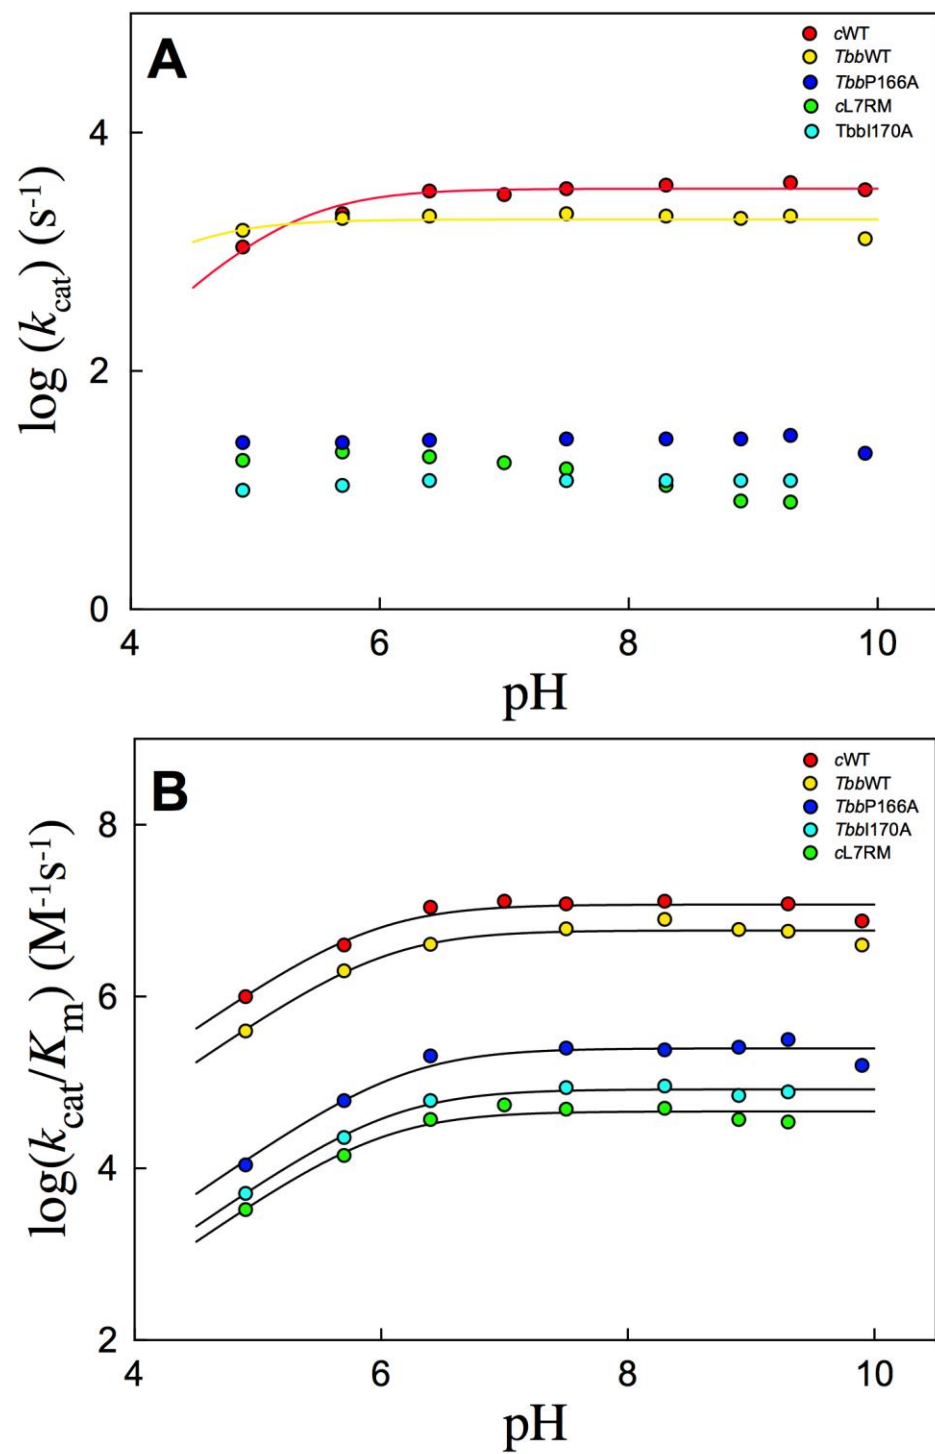

FIGURE S13

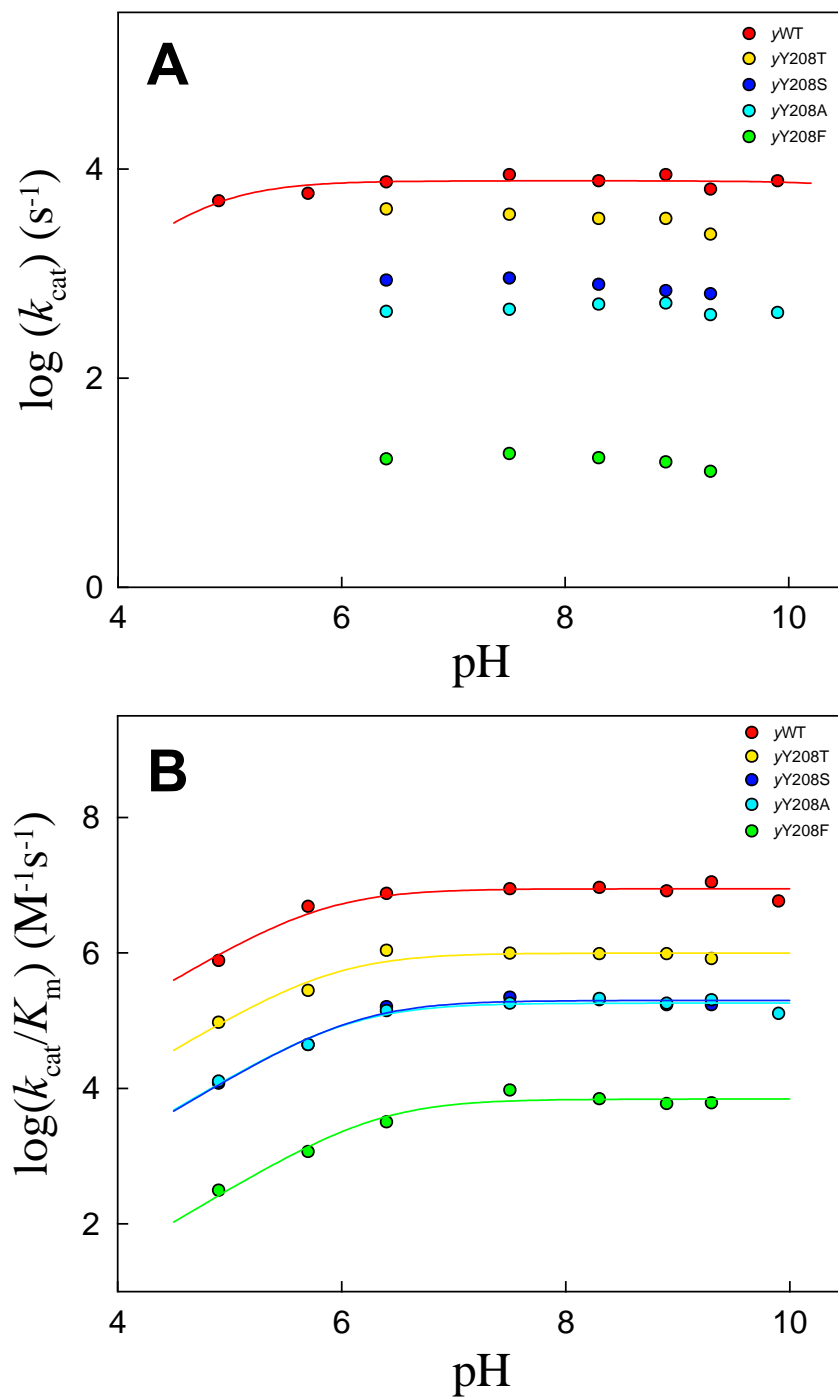

FIGURE S14

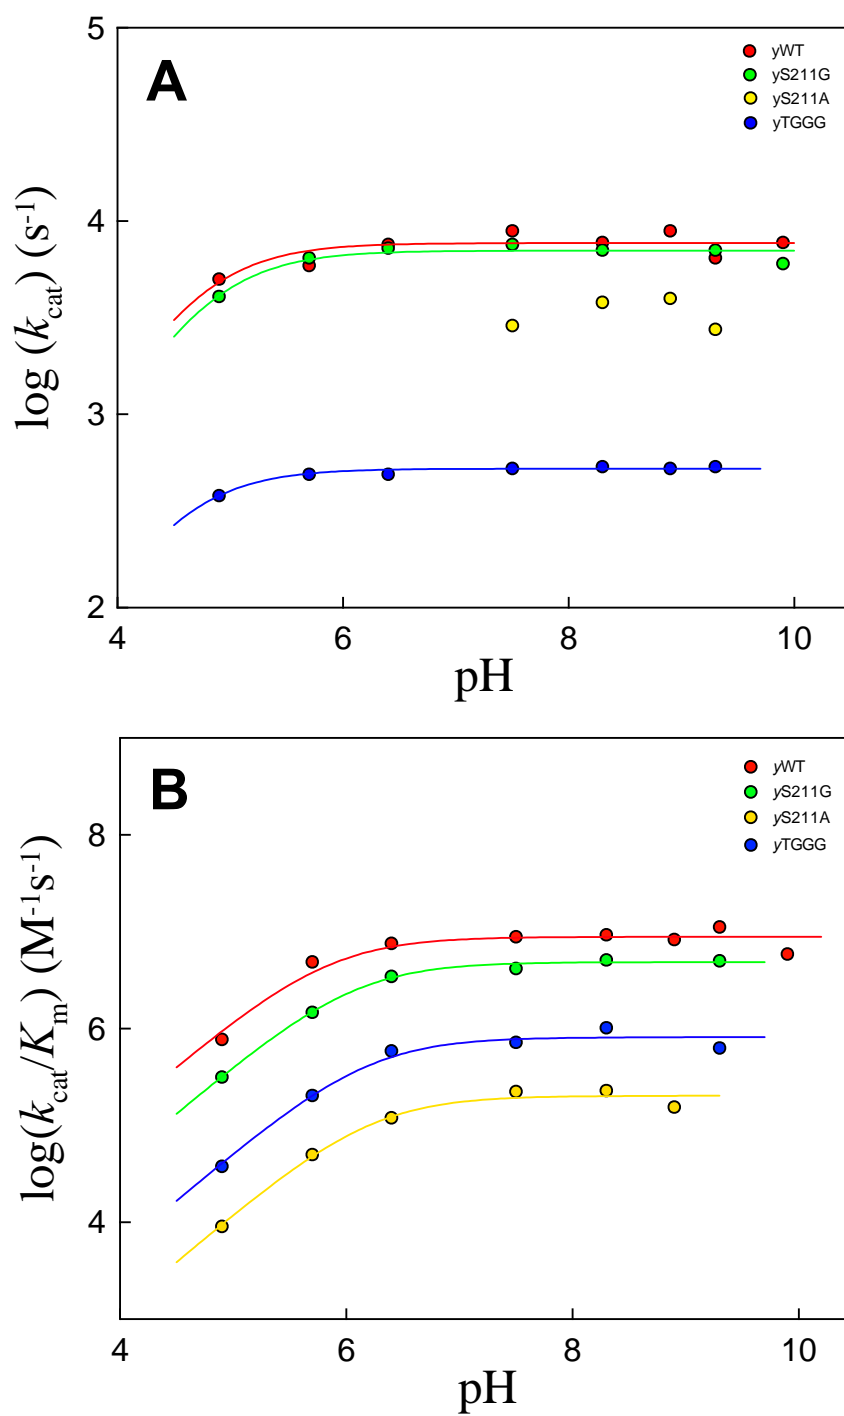

FIGURE S15

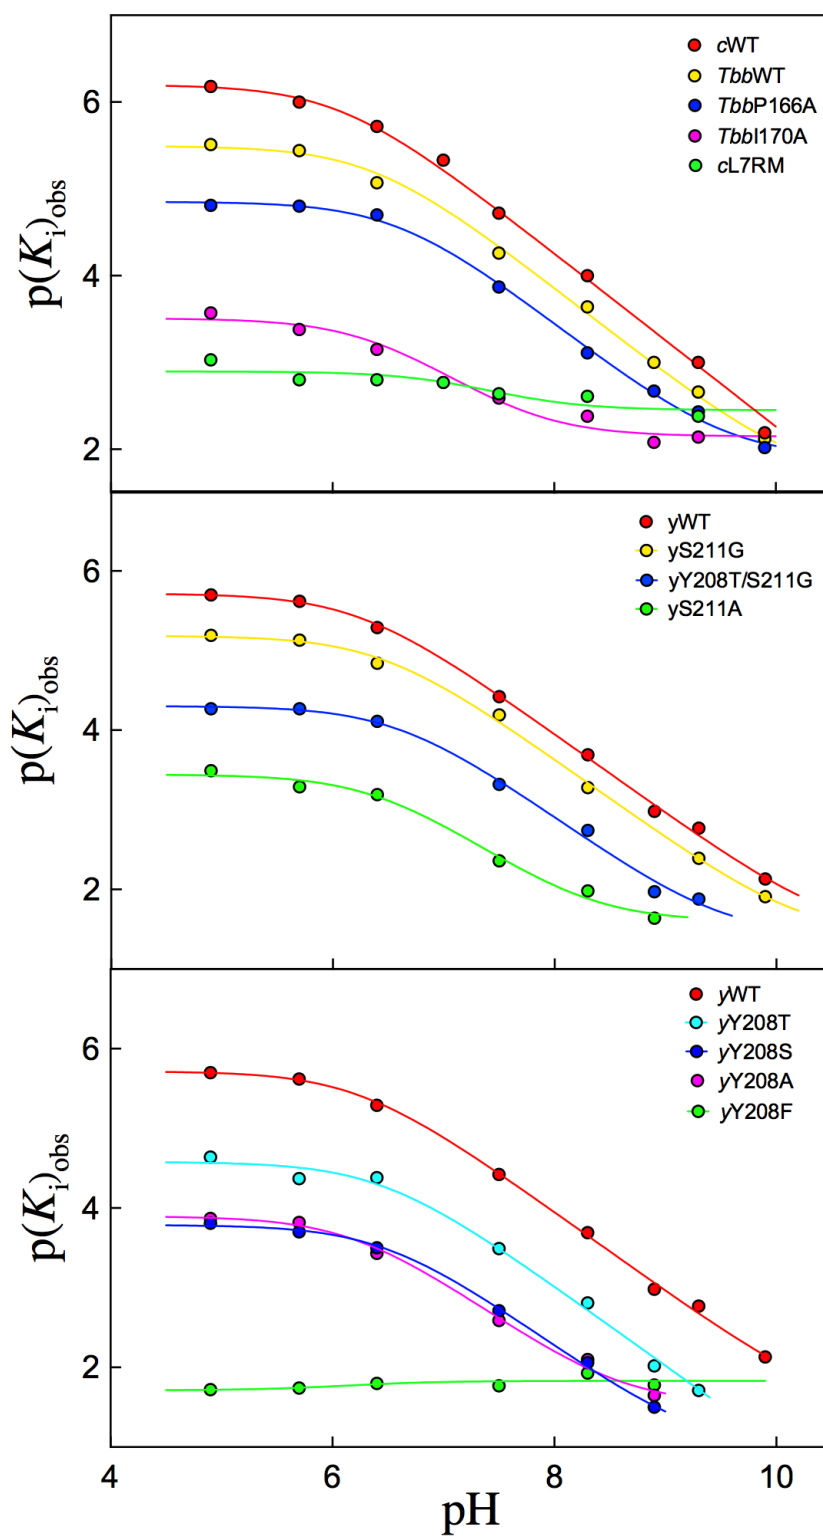

## REFERENCES

1. Malabanan, M. M.; Nitsch-Velasquez, L.; Amyes, T. L.; Richard, J. P., *J. Am. Chem. Soc.* **2013**, *135*, 5978-5981.
2. Hartman, F.; Lamuraglia, G.; Tomozawa, Y.; Wolfenden, R., *Biochemistry* **1975**, *14*, 5274-5279.
3. Zhai, X.; Amyes, T. L.; Wierenga, R. K.; Loria, J. P.; Richard, J. P., *Biochemistry* **2013**, *52*, 5928-5940.
